# Supplementary material for: Janus head type lone pair–π–lone pair and S⋯F⋯S interactions in retaining hexafluorobenzene
Source: Royal Society of Chemistry journal article supplement (doi:10.1039/c6ce00496b), 2016-01-01
Supplement: c6ce00496b1.pdf [file c6ce00496b1.pdf]

## Supporting Information

### **Janus head type lone pair– $\pi$ –lone pair and S $\cdots$ F $\cdots$ S interactions in retaining hexafluorobenzene**

Sonam Mehrotra and Raja Angamuthu\*

Figure S 1.  $^1\text{H}$  NMR spectrum of 2,4,6-tris(phenylthio)-1,3,5-triazine (1) in  $\text{CDCl}_3$ .

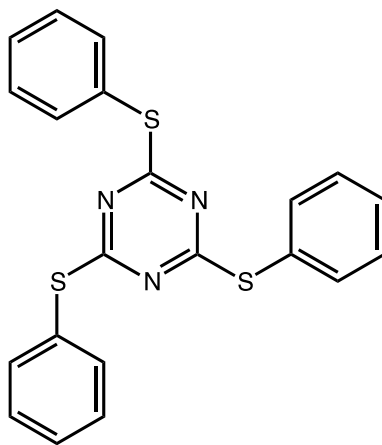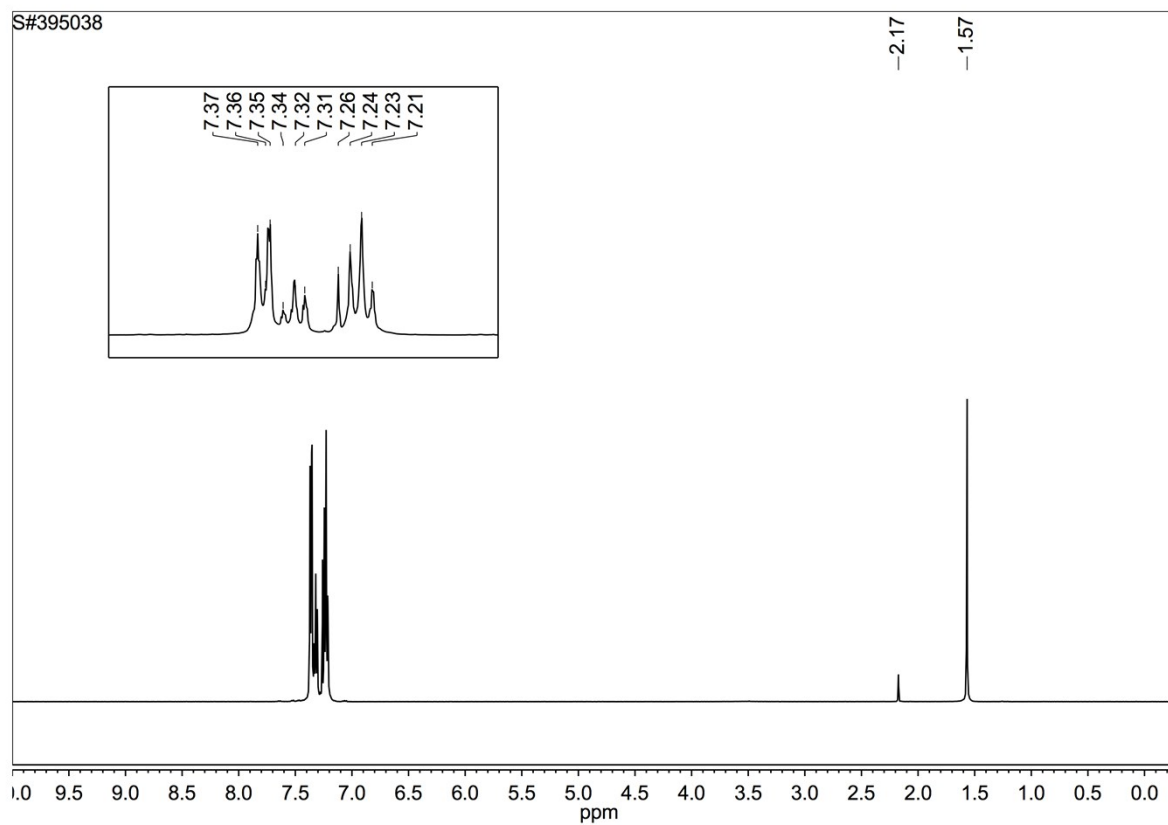

Figure S 2.  $^{13}\text{C}$  NMR spectrum of 2,4,6-tris(phenylthio)-1,3,5-triazine (1) in  $\text{CDCl}_3$ .

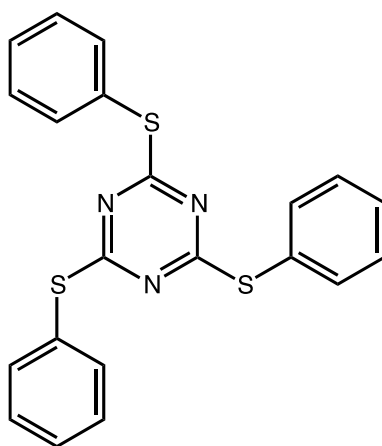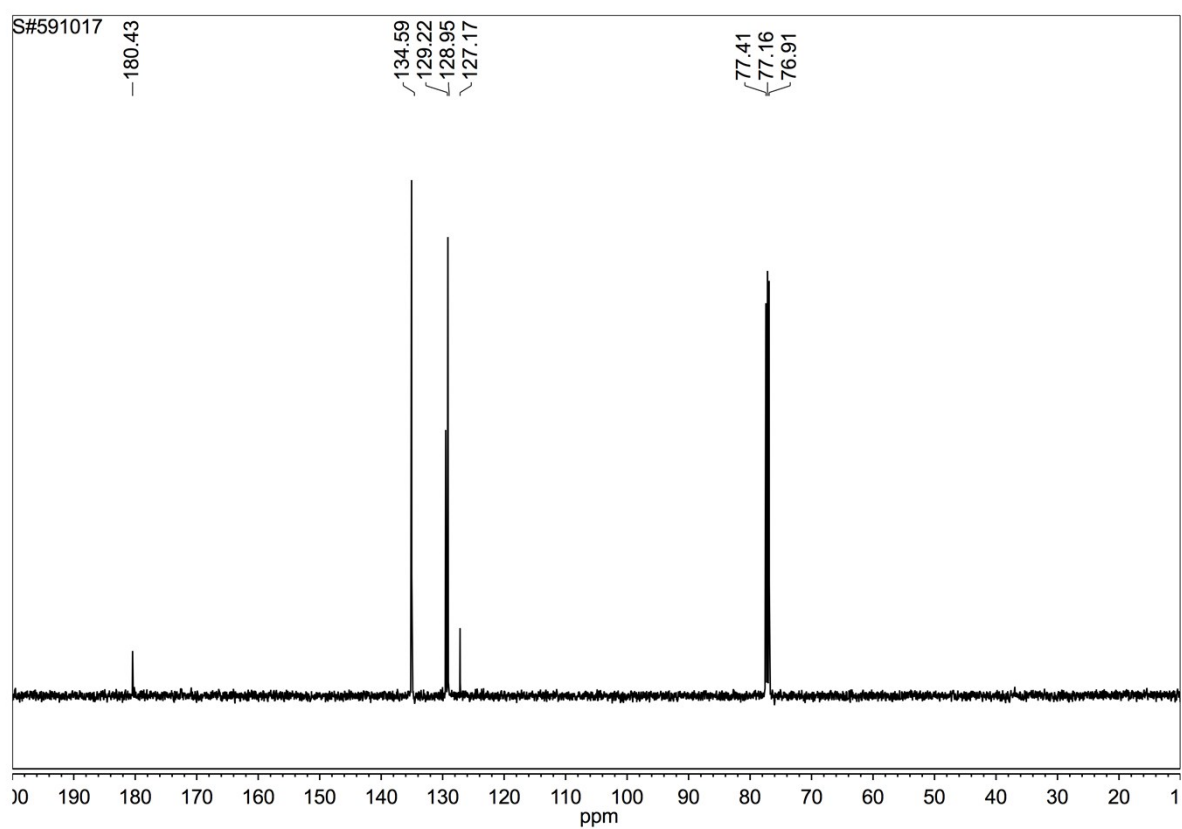

Figure S 3.  $^1\text{H}$  NMR spectrum of 2,4,6-tris(p-tolylthio)-1,3,5-triazine (2) in  $\text{CDCl}_3$ .

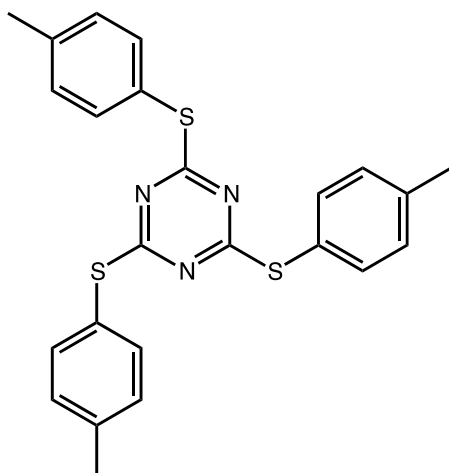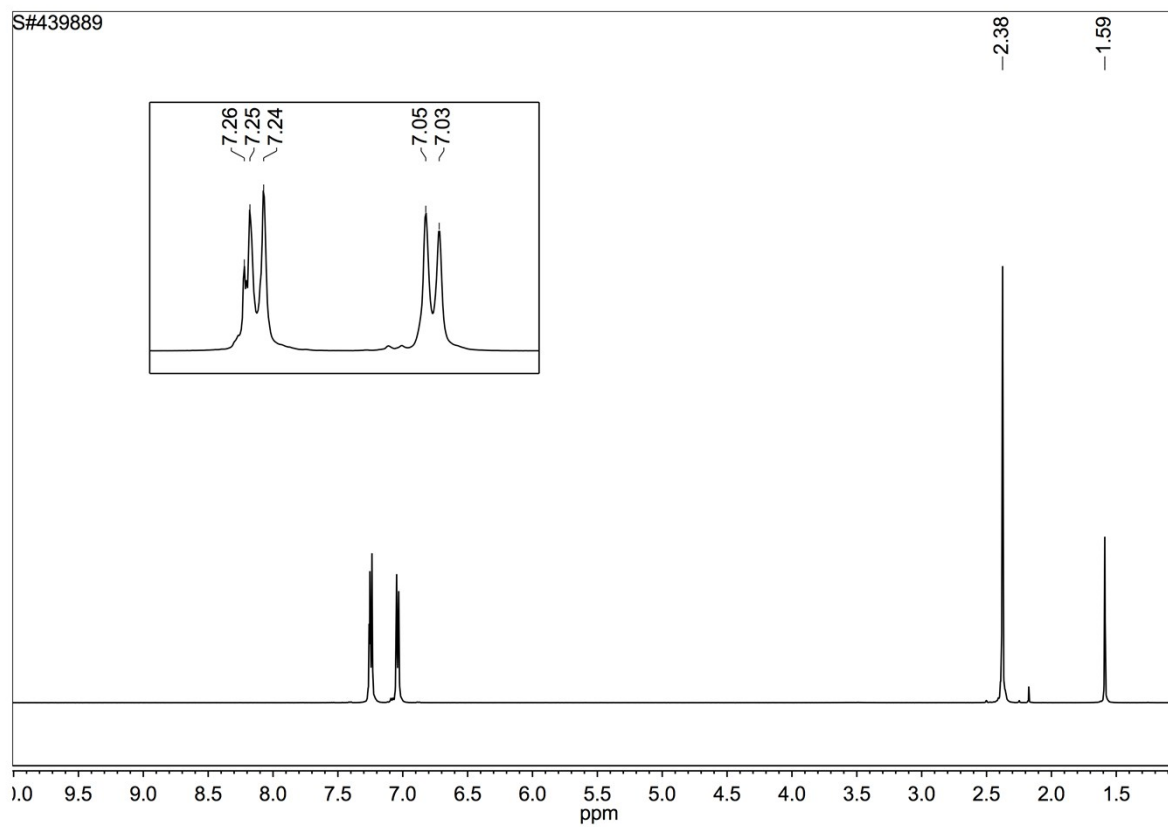

Figure S 4.  $^{13}\text{C}$  NMR spectrum of 2,4,6-tris(p-tolylthio)-1,3,5-triazine (2) in  $\text{CDCl}_3$ .

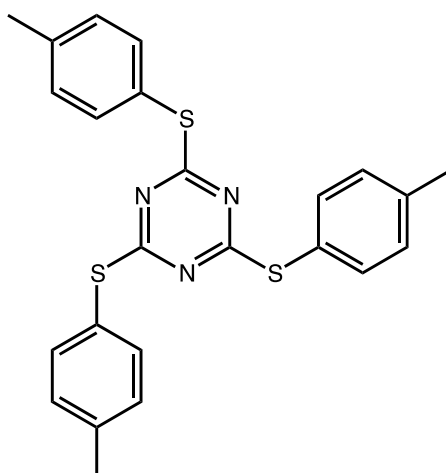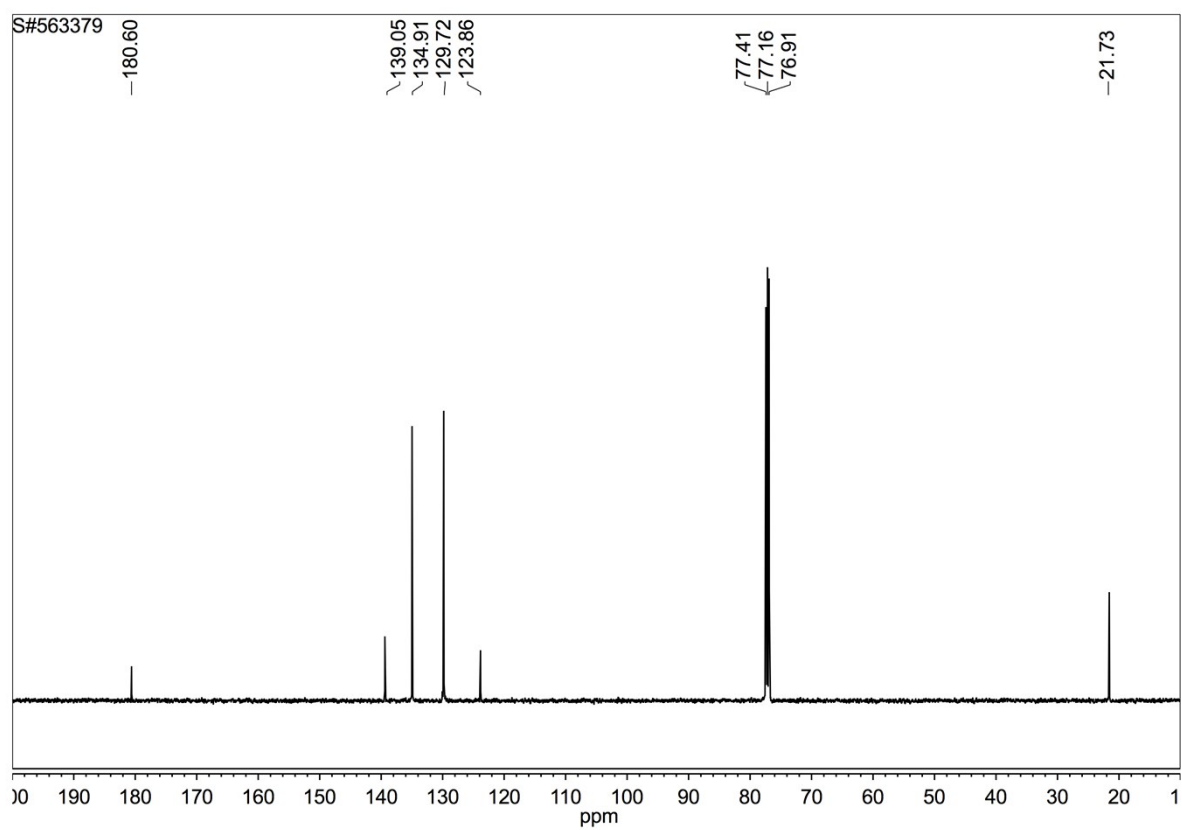

Figure S 5.  $^1\text{H}$  NMR spectrum of 2,4,6-tris((4-chlorophenyl)thio)-1,3,5-triazine (3) in  $\text{CDCl}_3$ .

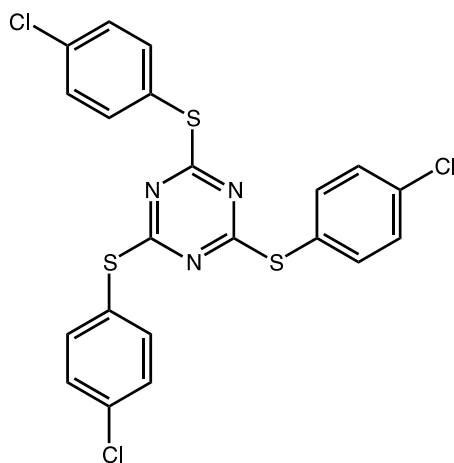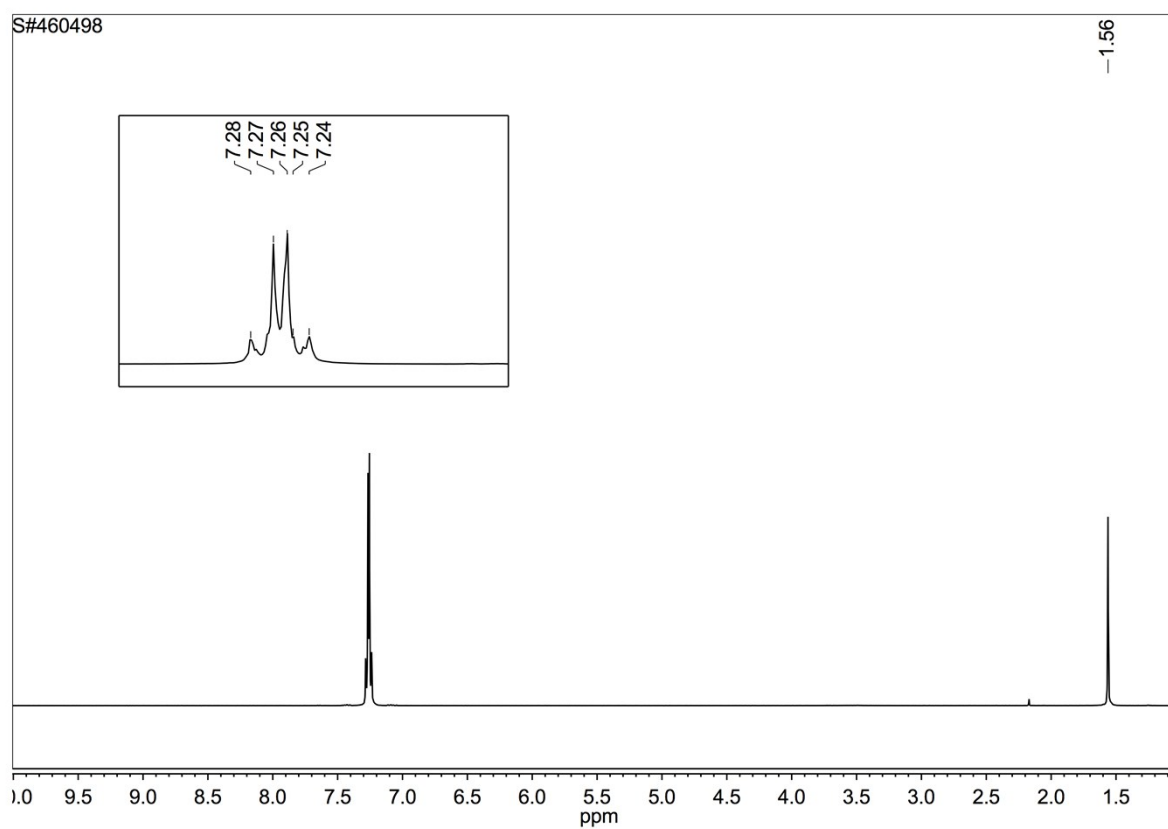

Figure S 6.  $^{13}\text{C}$  NMR spectrum of 2,4,6-tris((4-chlorophenyl)thio)-1,3,5-triazine (3) in  $\text{CDCl}_3$ .

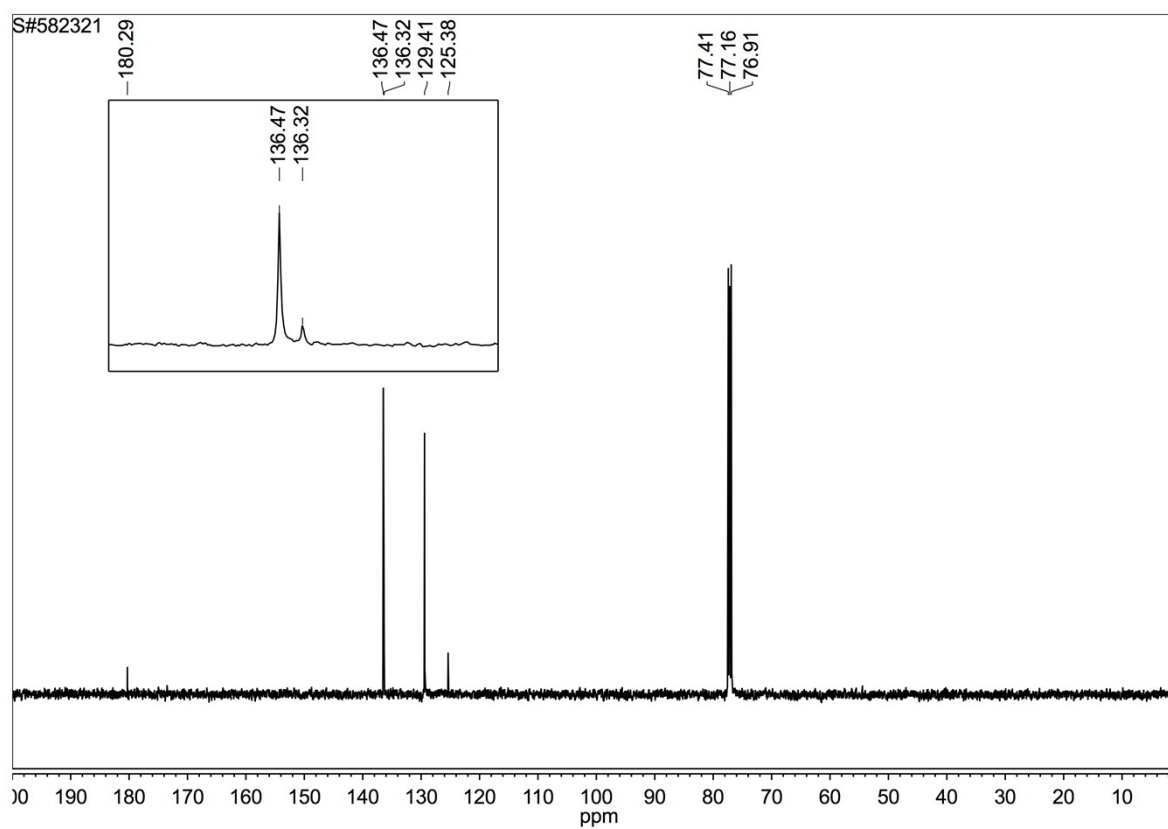

Figure S 7.  $^1\text{H}$  NMR spectrum of 3-nitrobenzene-1-sulfonyl chloride in  $\text{CDCl}_3$ .

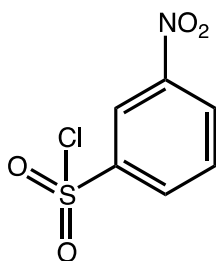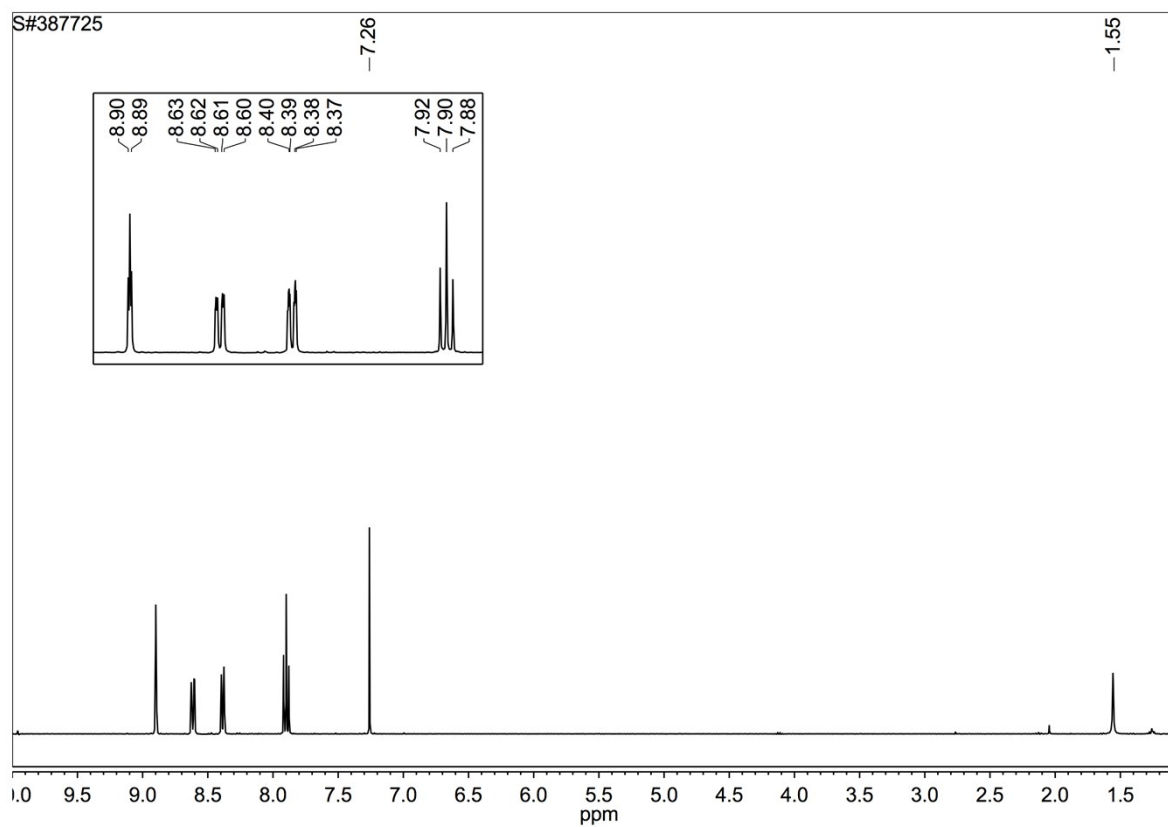



Figure S 8.  $^{13}\text{C}$  NMR spectrum of 3-nitrobenzene-1-sulfonyl chloride in  $\text{CDCl}_3$ .

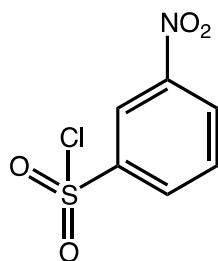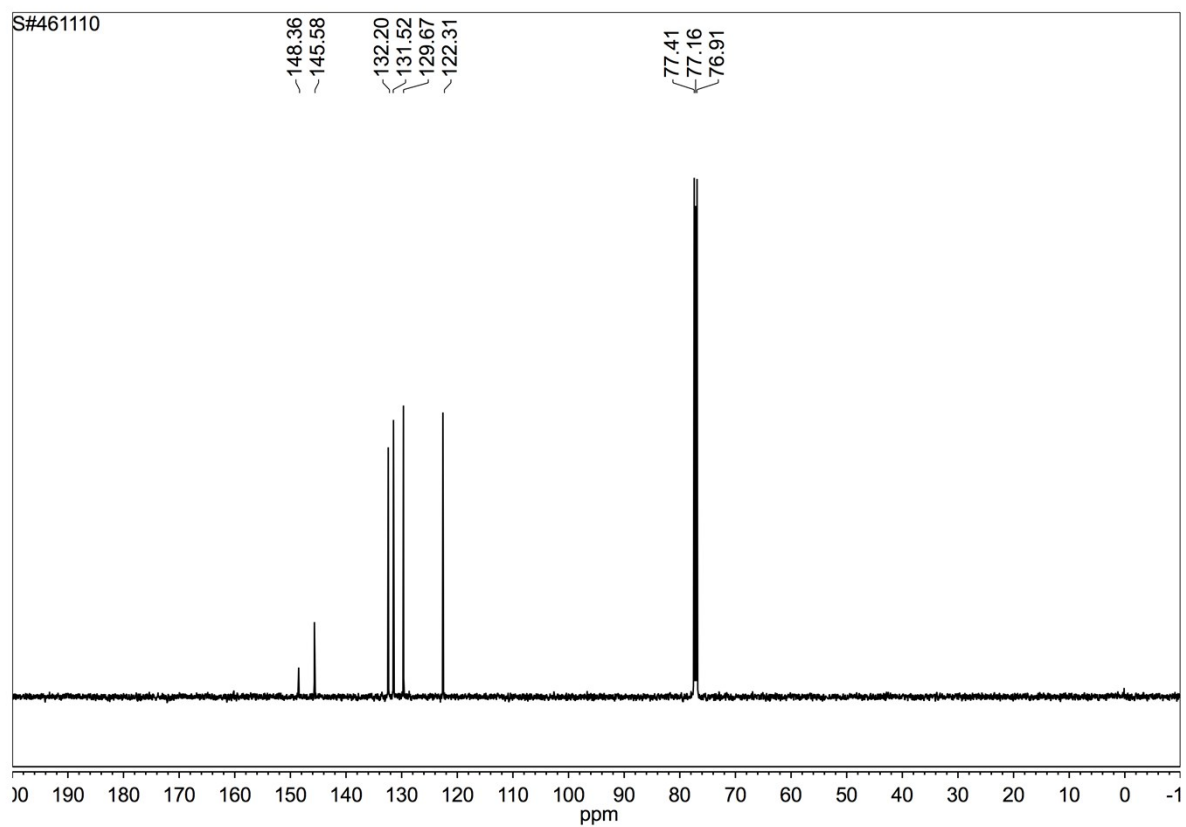

Figure S 9.  $^1\text{H}$  NMR spectrum of 3-nitrobenzenethiol in  $\text{CDCl}_3$ .

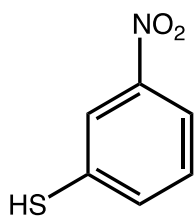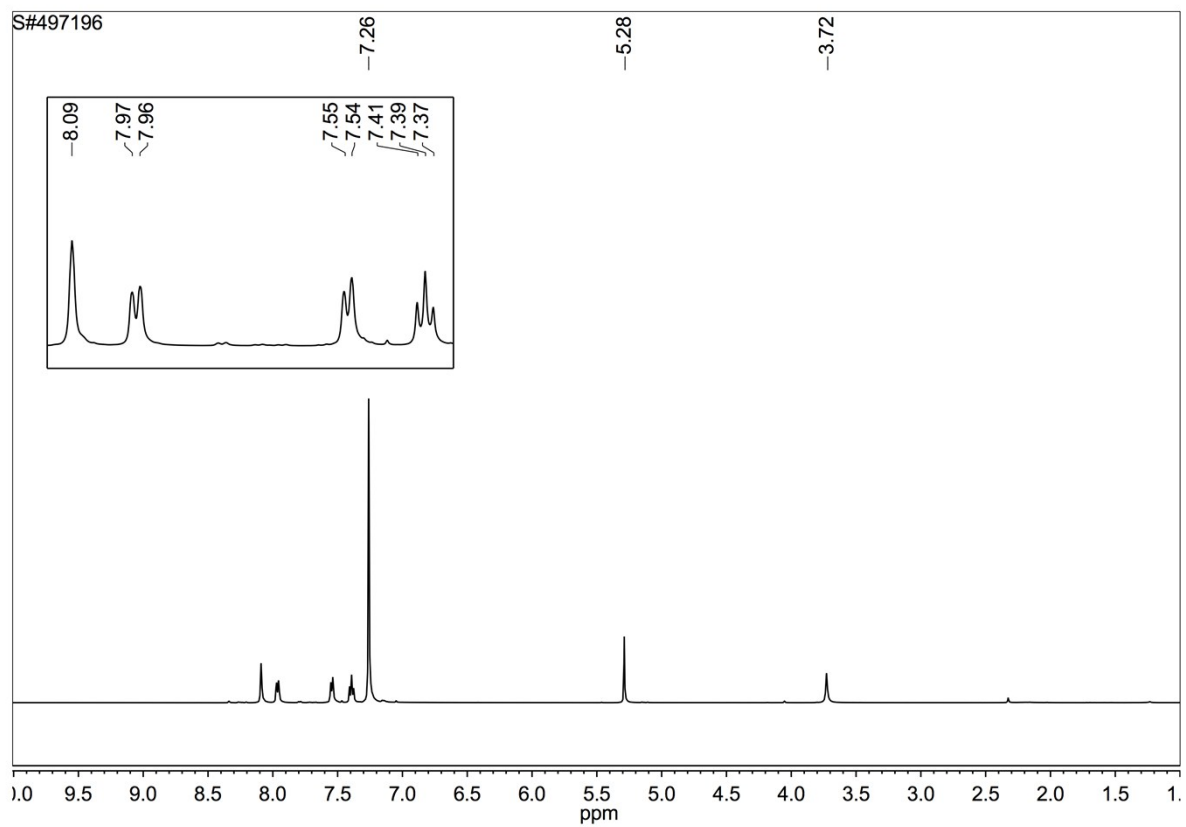

Figure S 10.  $^{13}\text{C}$  NMR spectrum of 3-nitrobenzenethiol in  $\text{CDCl}_3$ .

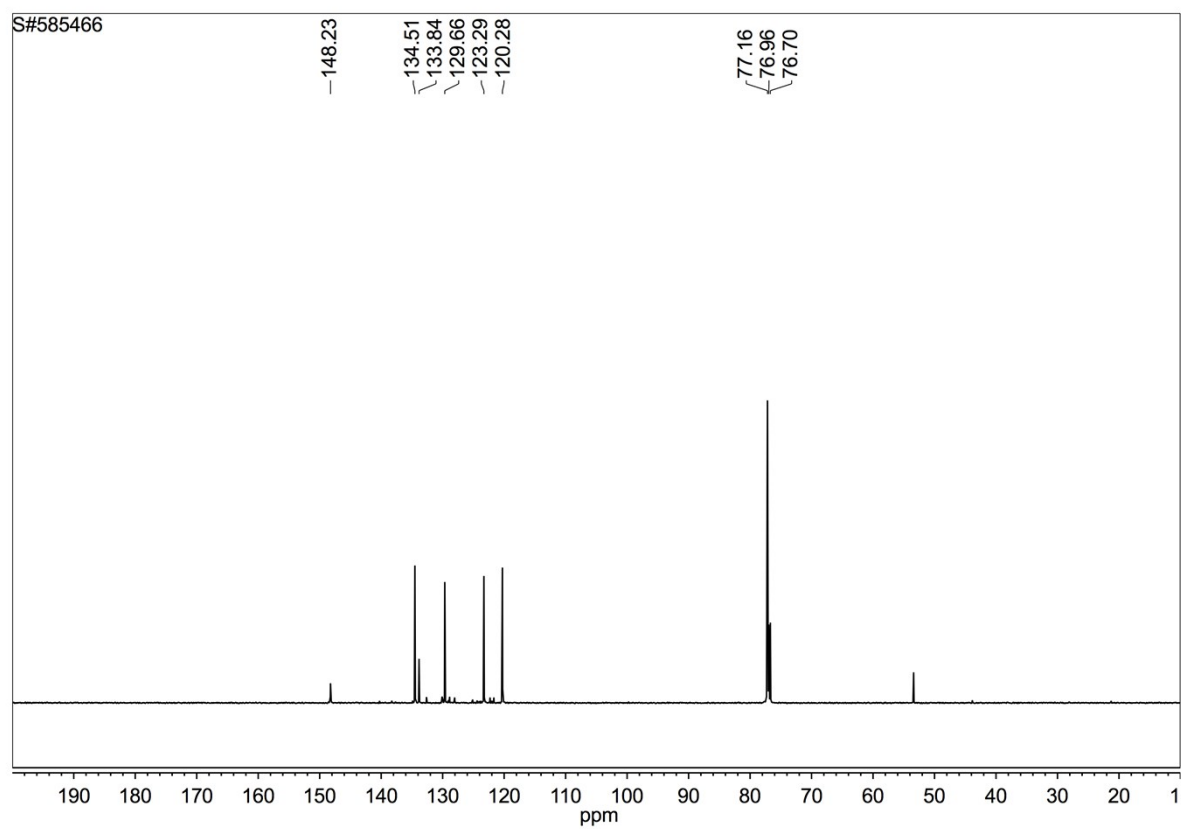

Figure S 11. <sup>1</sup>H NMR spectrum of 2,4,6-tris((3-nitrophenyl)thio)-1,3,5-triazine (4) in DMSO-d<sub>6</sub>.

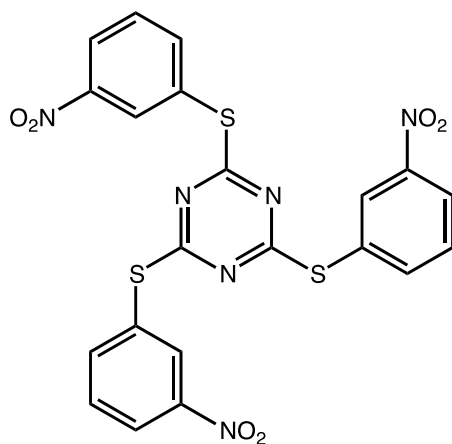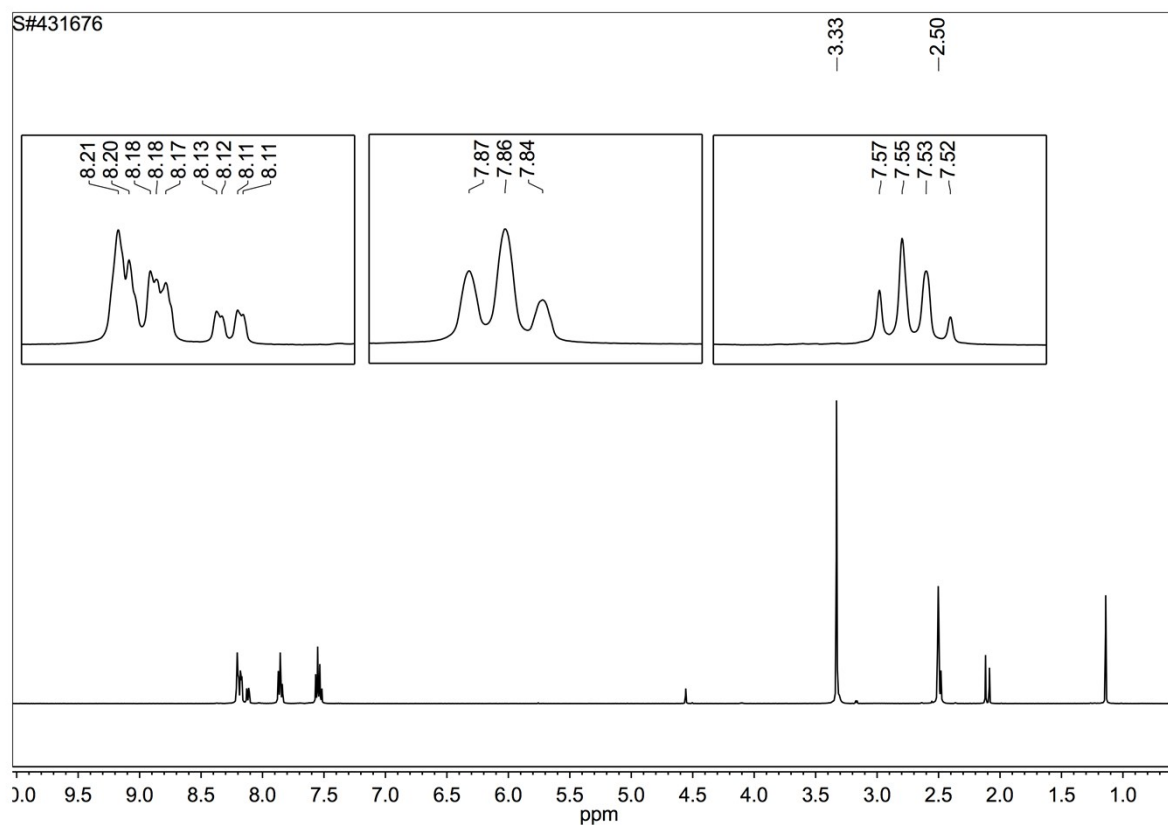

Figure S 12.  $^{13}\text{C}$  NMR spectrum of 2,4,6-tris((3-nitrophenyl)thio)-1,3,5-triazine (4) in  $\text{DMSO-d}_6$ .

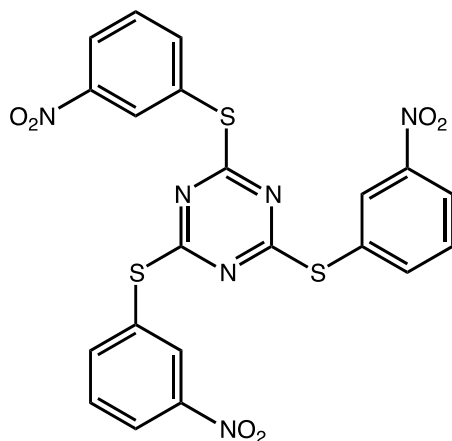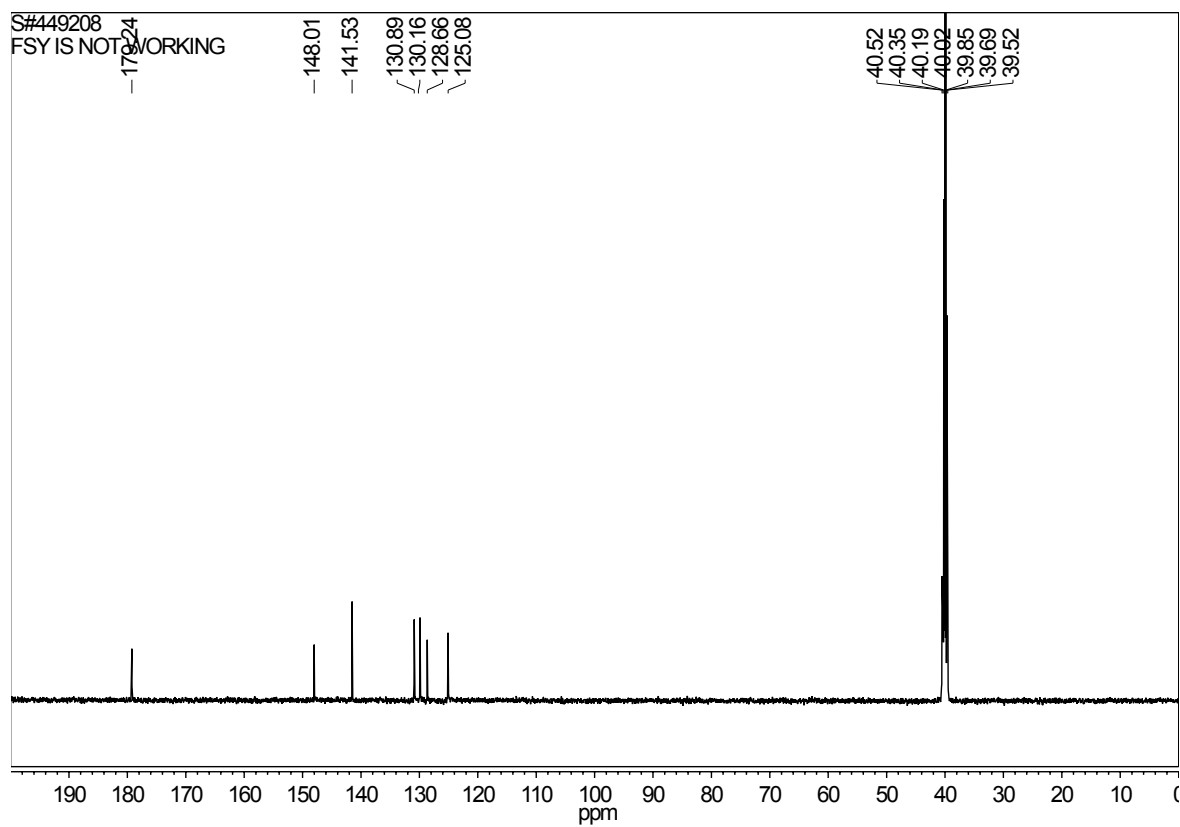

Figure S 13.  $^1\text{H}$  NMR spectrum of 2-methyl-5-nitrobenzene-1-sulfonyl chloride in DMSO-d<sub>6</sub>.

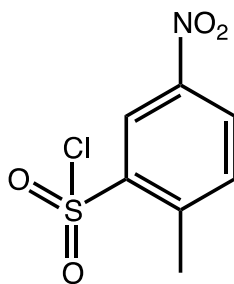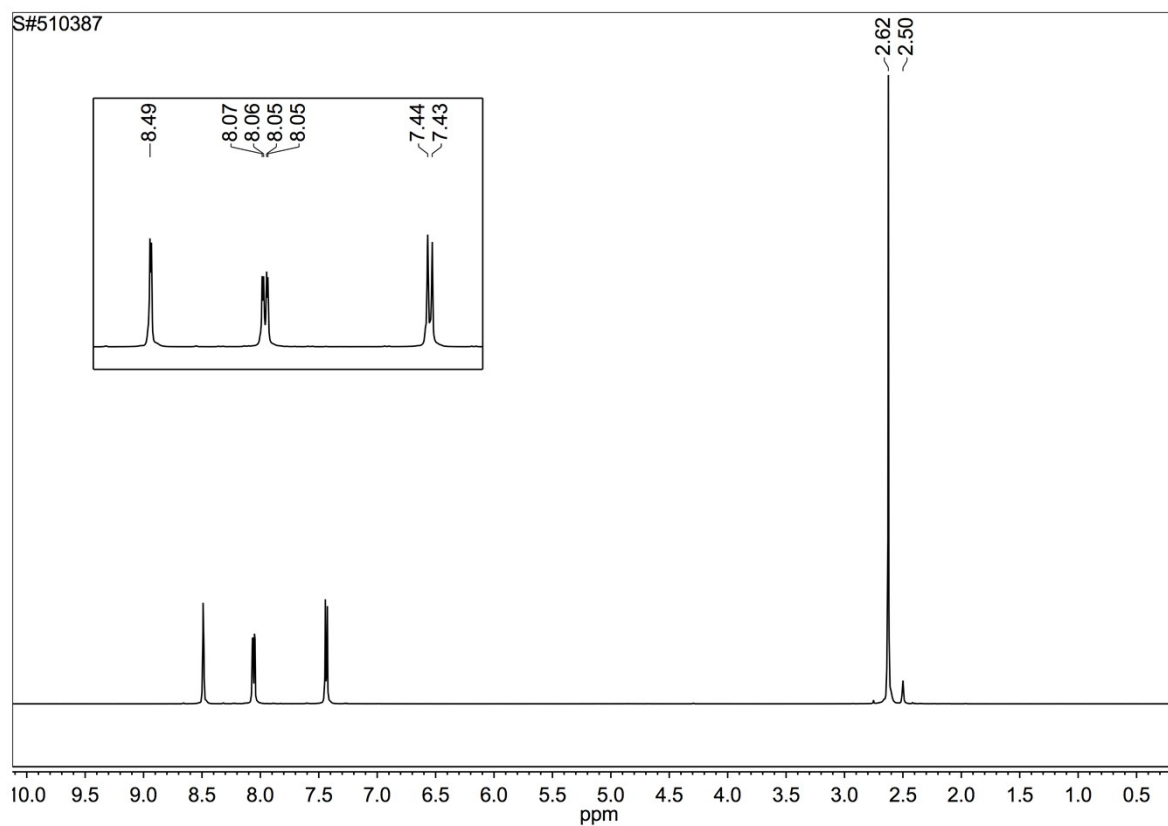

Figure S 14.  $^{13}\text{C}$  NMR spectrum of 2-methyl-5-nitrobenzene-1-sulfonyl chloride in DMSO-d<sub>6</sub>.

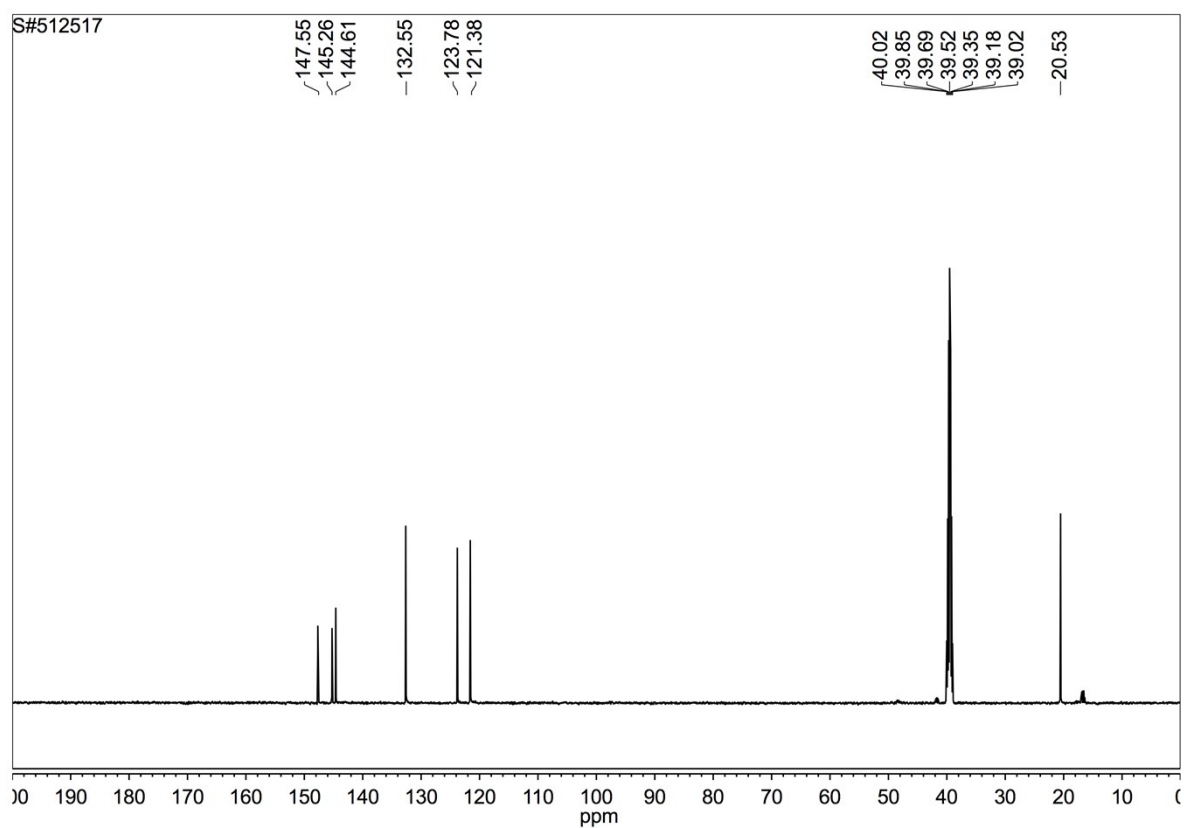

Figure S 15.  $^1\text{H}$  NMR spectrum of 2-methyl-5-nitrobenzenethiol in  $\text{CDCl}_3$ .

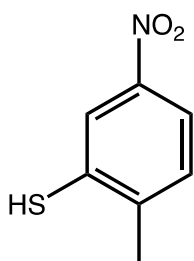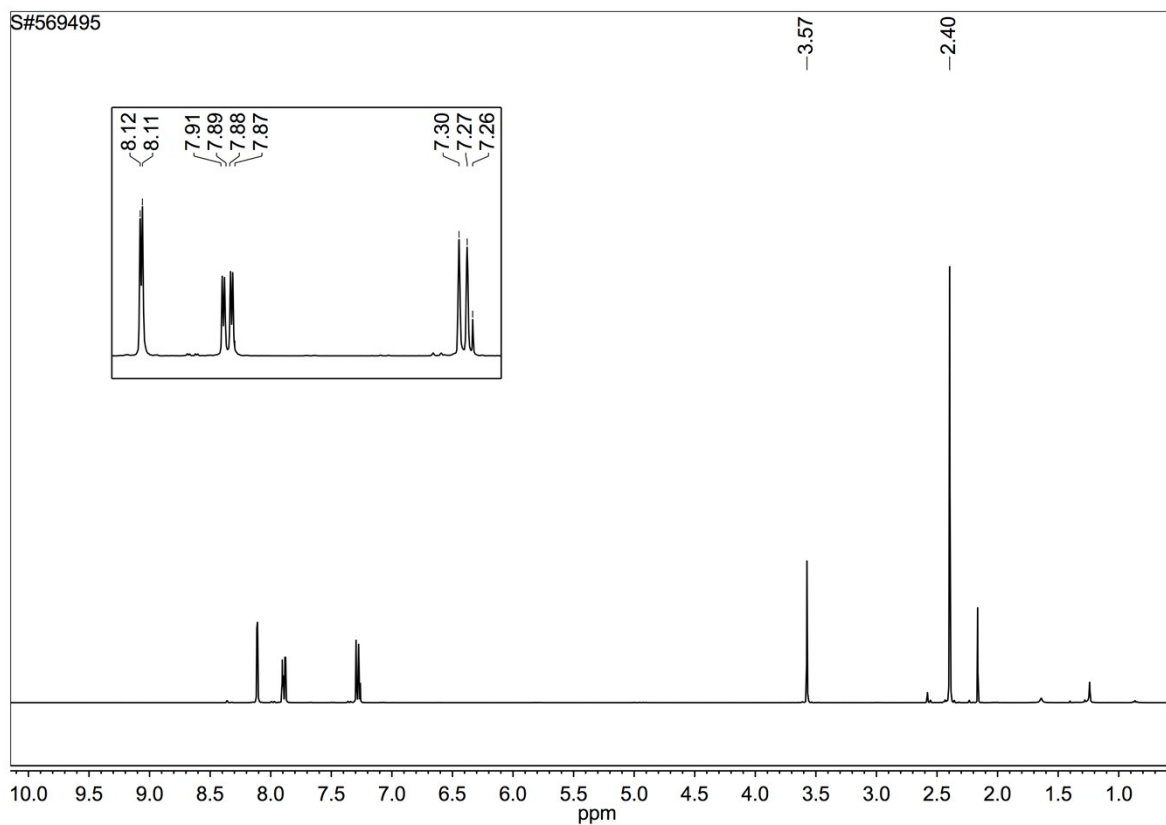



Figure S 16.  $^{13}\text{C}$  NMR spectrum of 2-methyl-5-nitrobenzenethiol in  $\text{CDCl}_3$ .

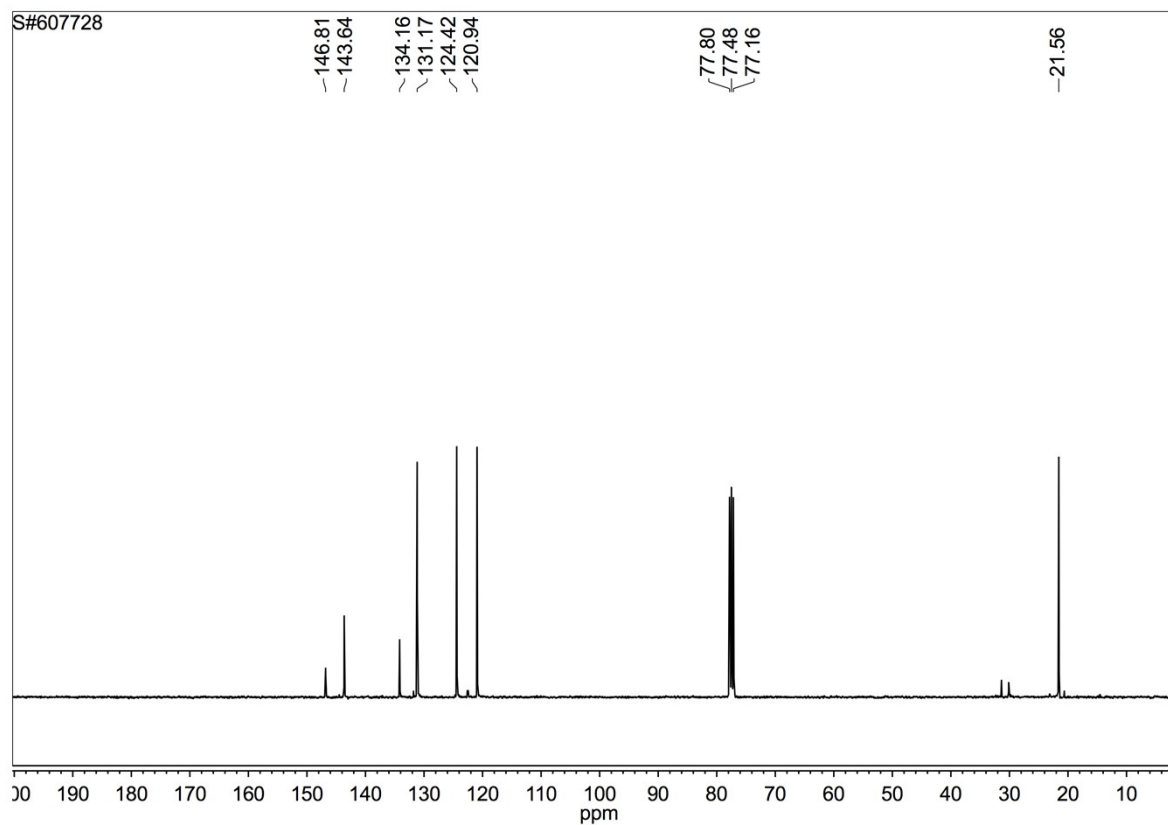

Figure S 17. <sup>1</sup>H NMR spectrum of 2,4,6-tris((2-methyl-5-nitrophenyl)thio)-1,3,5-triazine (5) in DMSO-d<sub>6</sub>.

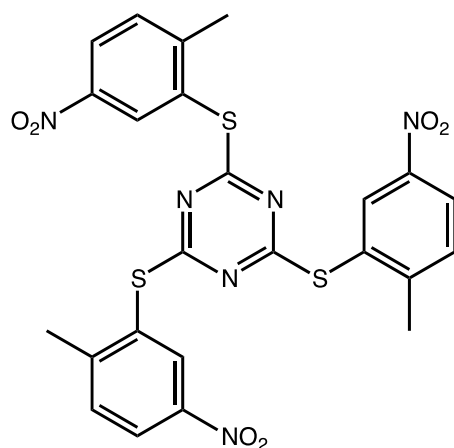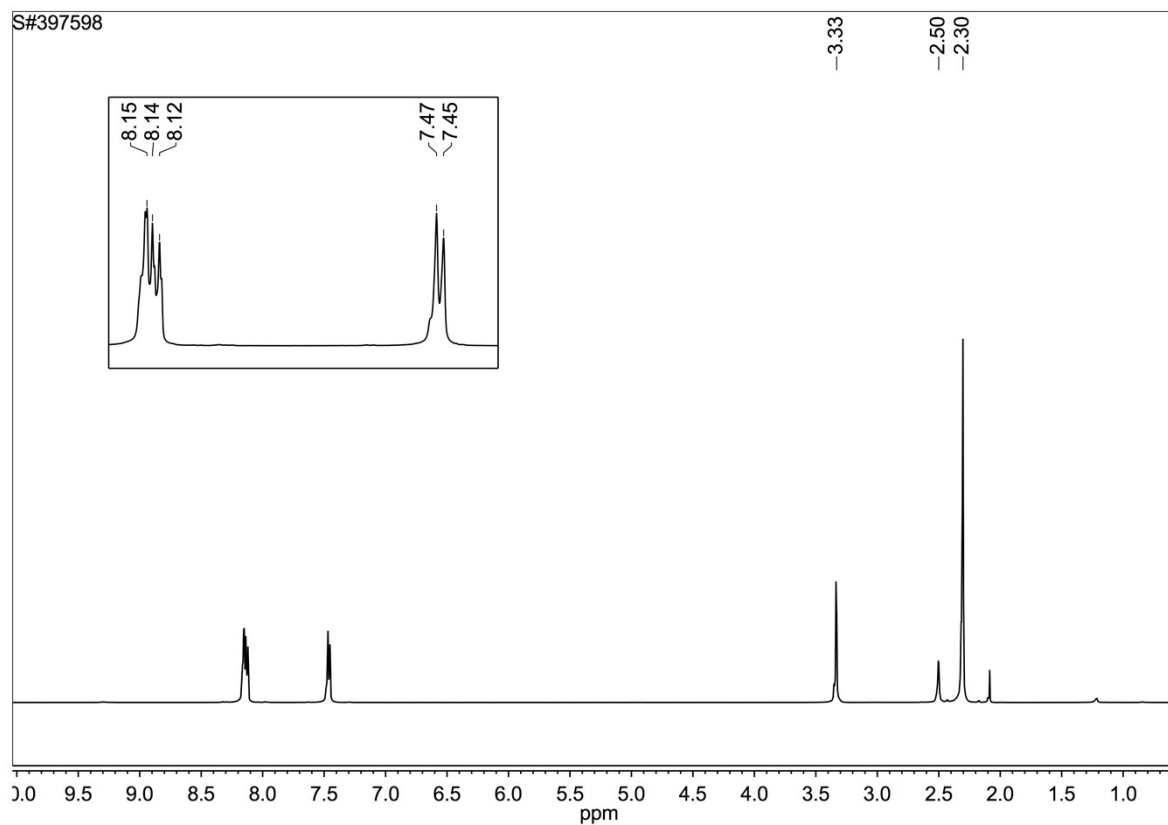

Figure S 18.  $^{13}\text{C}$  NMR spectrum of 2,4,6-tris((2-methyl-5-nitrophenyl)thio)-1,3,5-triazine (5): in DMSO- $d_6$ .

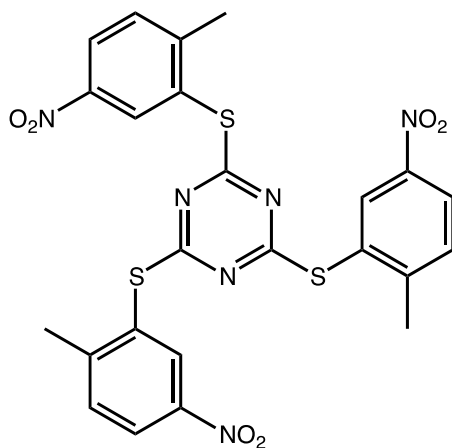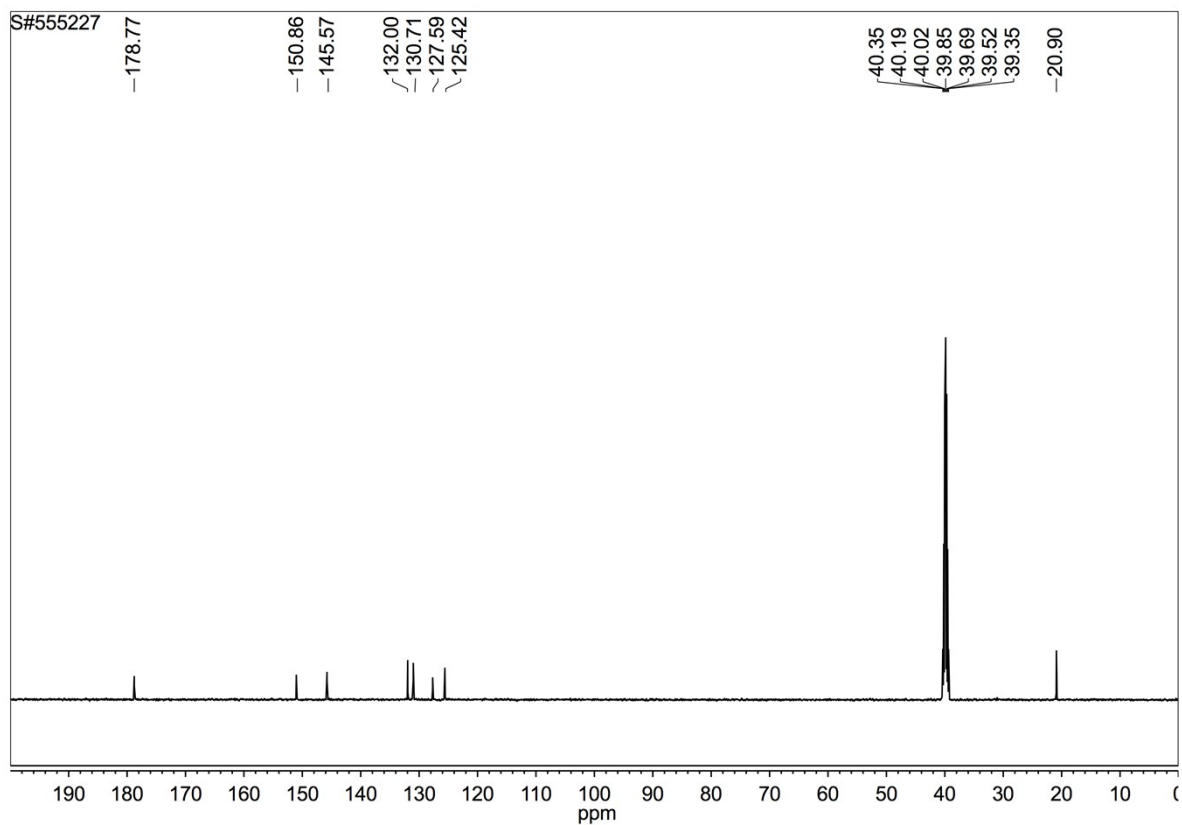

Figure S 19.  $^1\text{H}$  NMR spectrum of 2,4,6-tris(2,6-dimethylphenylthio)-1,3,5-triazine (6)

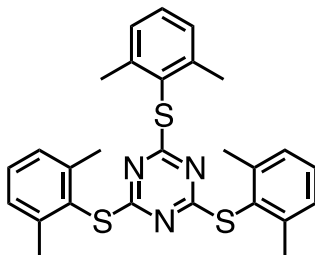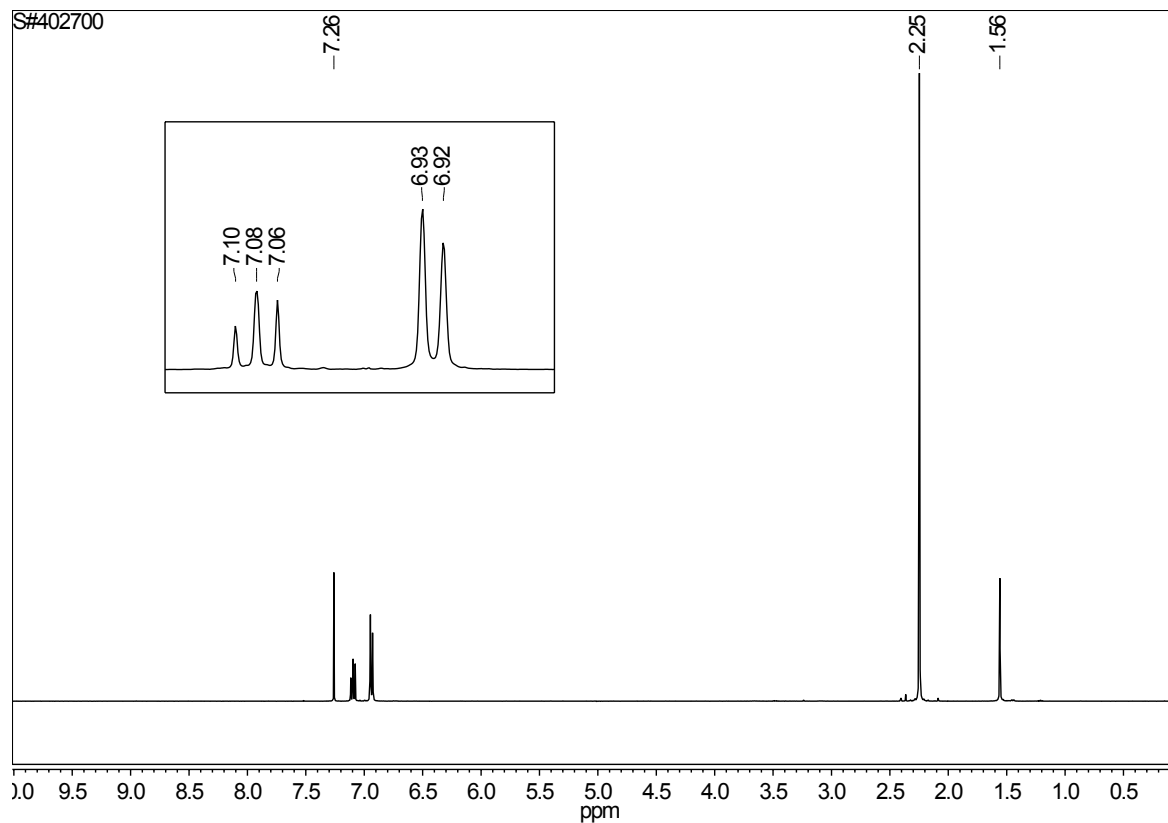

Figure S 20.  $^{13}\text{C}$  NMR spectrum of 2,4,6-tris(2,6-dimethylphenylthio)-1,3,5-triazine (6)

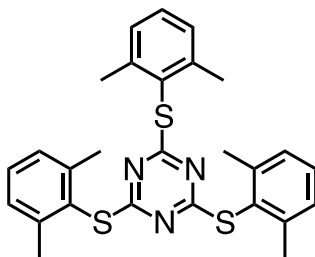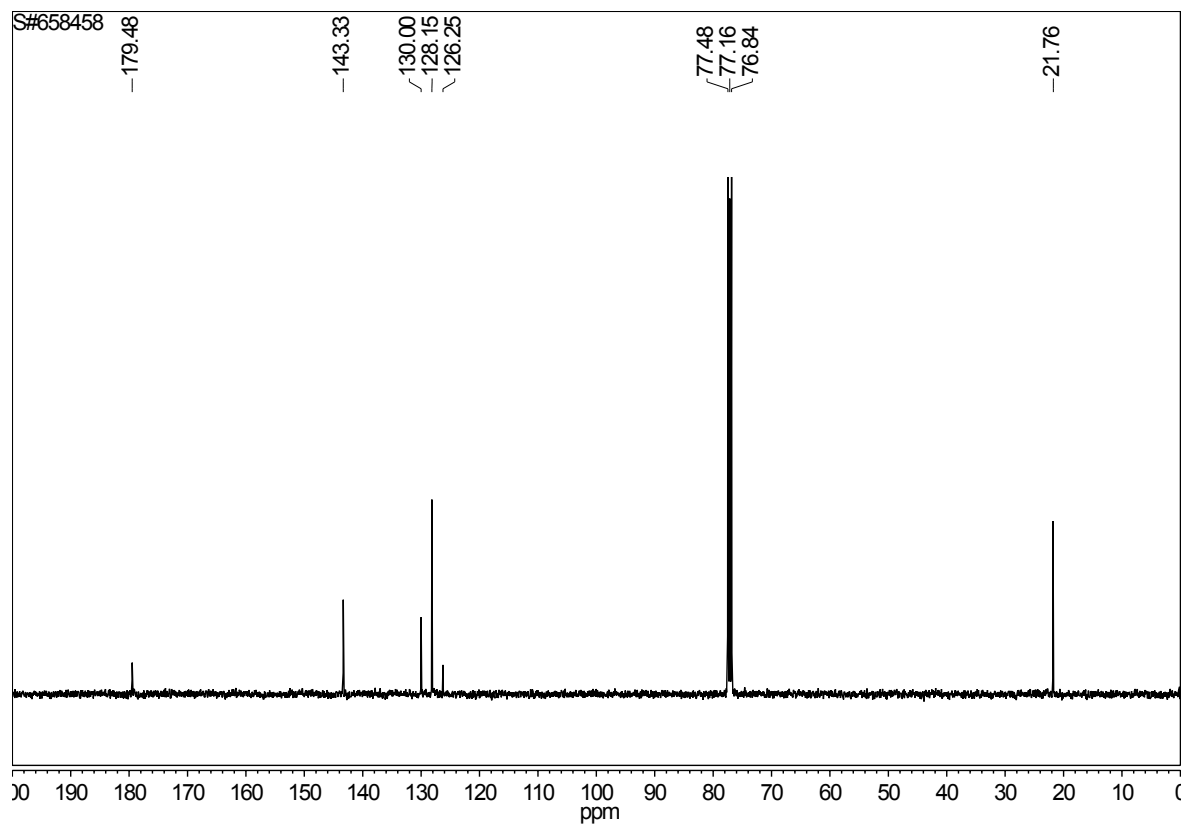

Figure S 21.  $^1\text{H}$  NMR spectrum of 2,3,4,5,6-pentamethylbenzenethiol

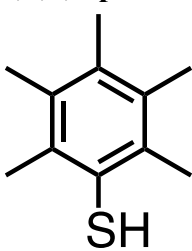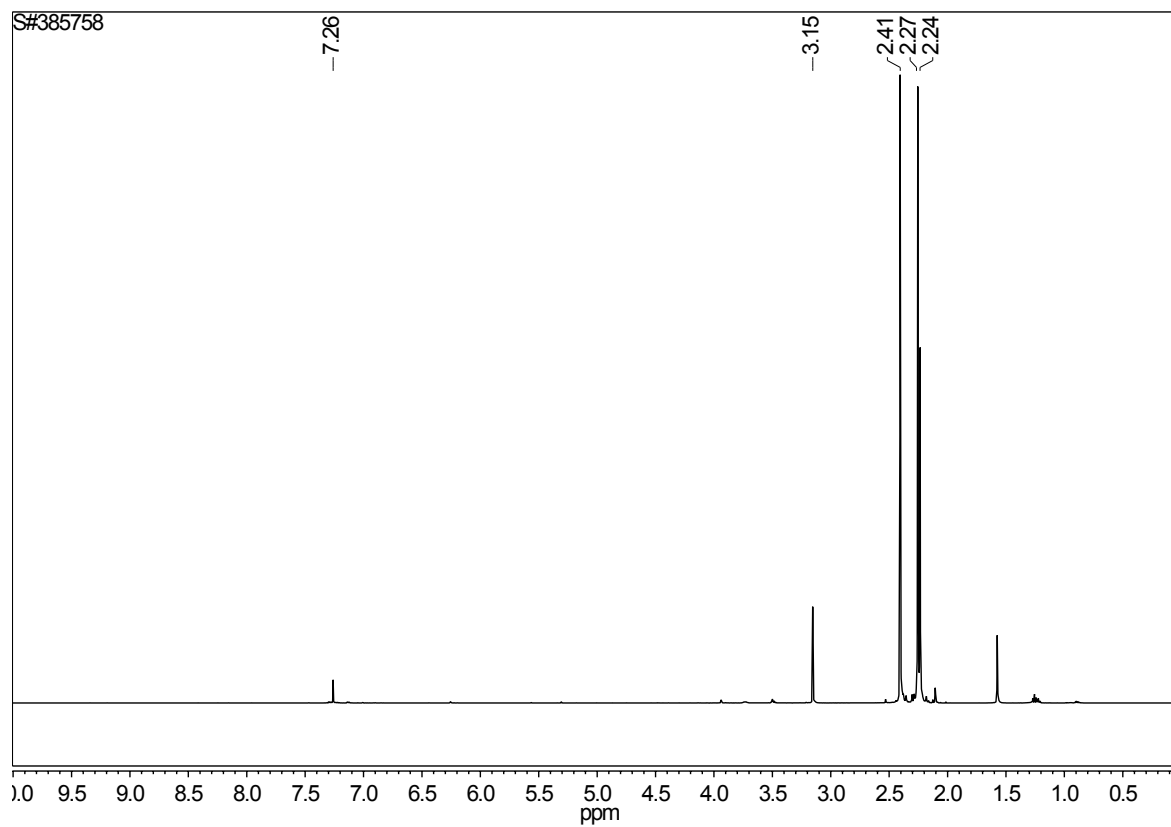

Figure S 22.  $^{13}\text{C}$  NMR spectrum of 2,3,4,5,6-pentamethylbenzenethiol

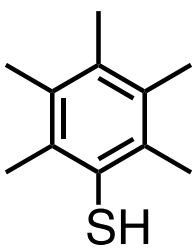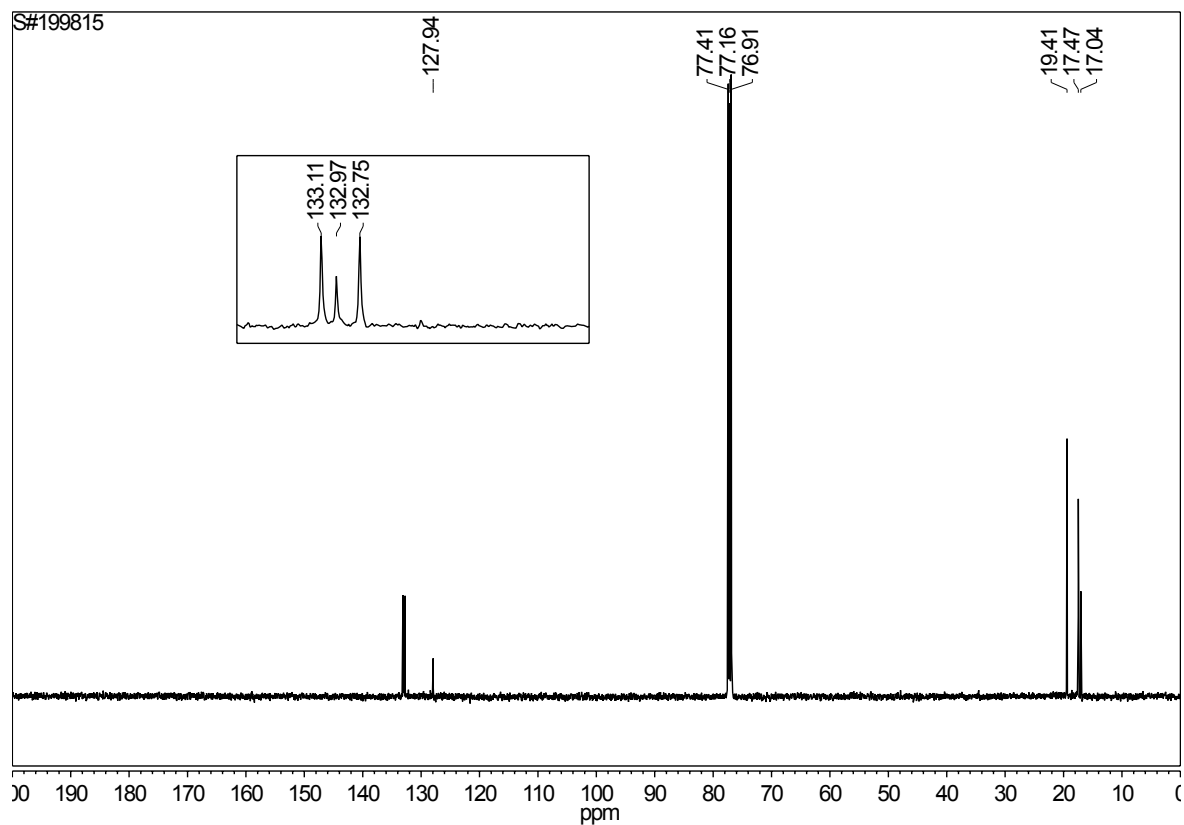

Figure S 23.  $^1\text{H}$  NMR spectrum of 2,4,6-tris(2,3,4,5,6-pentamethyl phenylthio)-1,3,5-triazine (7)

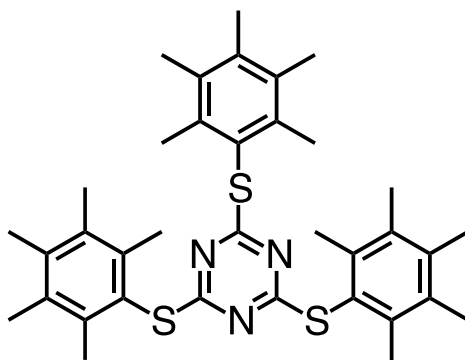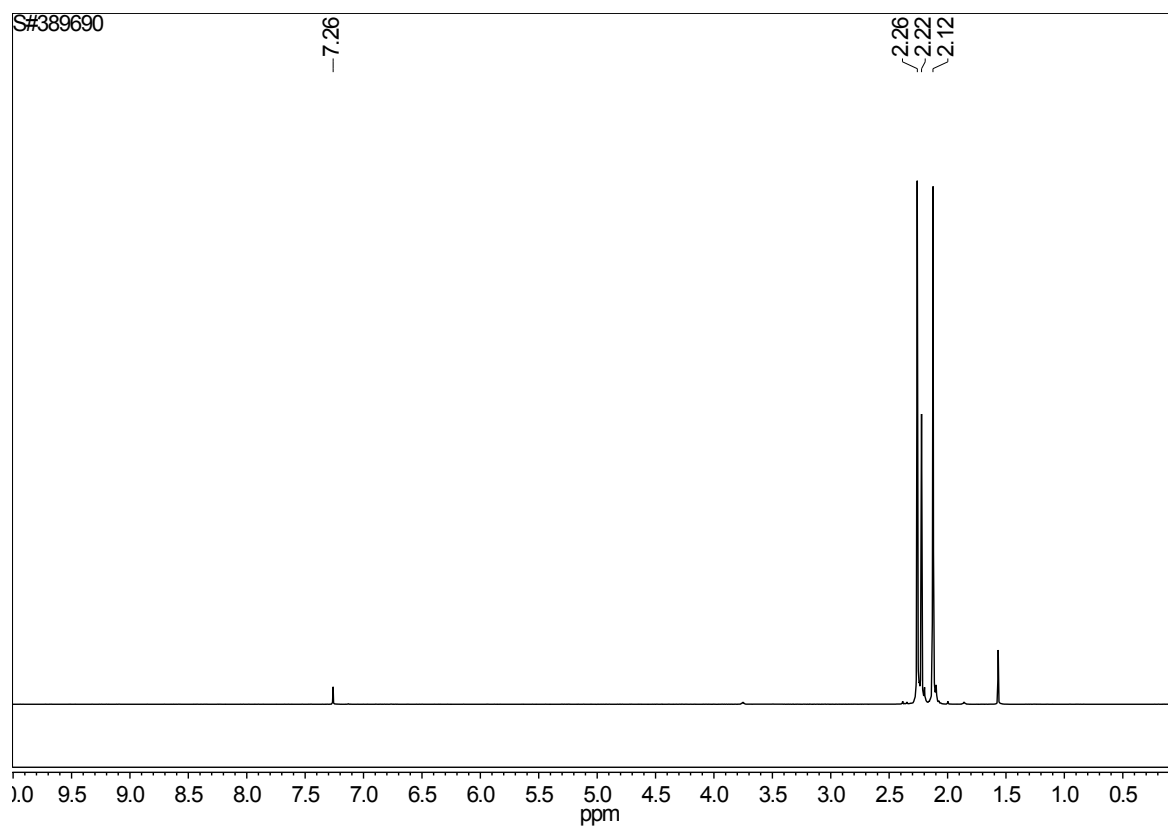



Figure S 24.  $^{13}\text{C}$  NMR spectrum of 2,4,6-tris(2,3,4,5,6-pentamethyl phenylthio)-1,3,5-triazine (7)

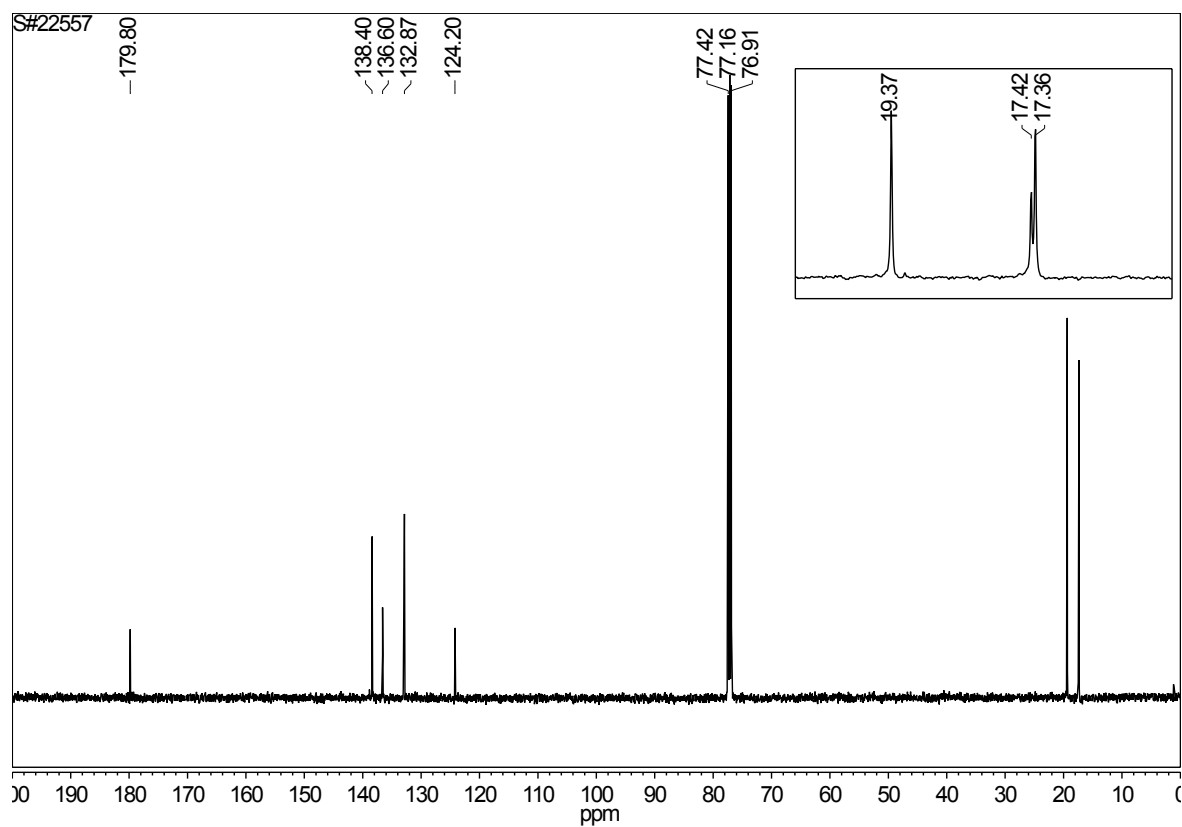

Figure S 25.  $^1\text{H}$  NMR spectrum of 2,4,6-tris((2,3,5,6-tetrafluorophenyl)thio)-1,3,5-triazine (8).

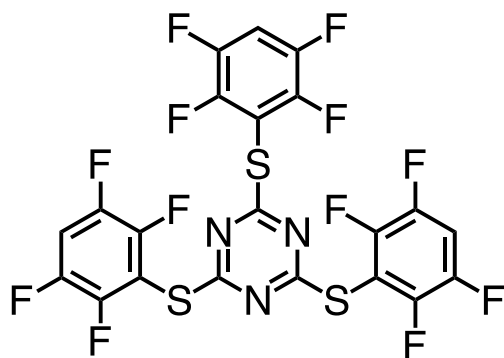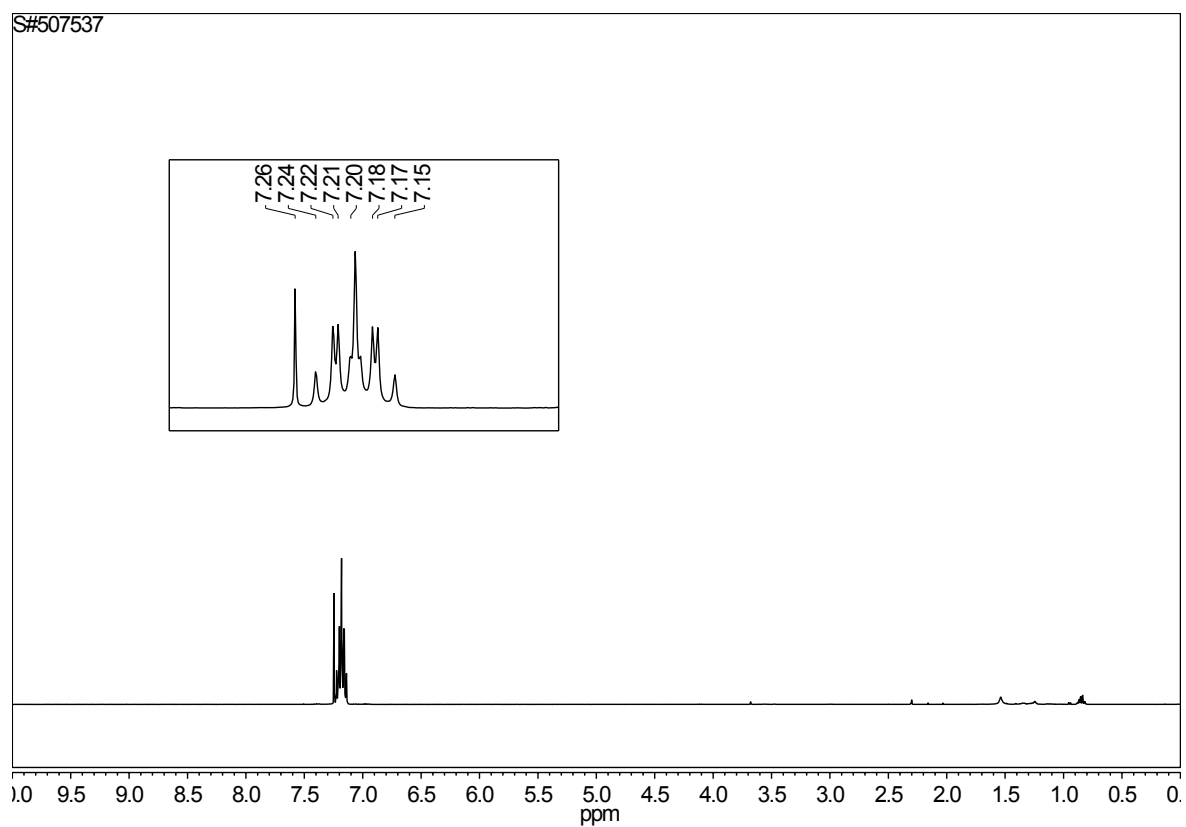

Figure S 26.  $^{13}\text{C}$  NMR spectrum of 2,4,6-tris((2,3,5,6-tetrafluorophenyl)thio)-1,3,5-triazine (8).

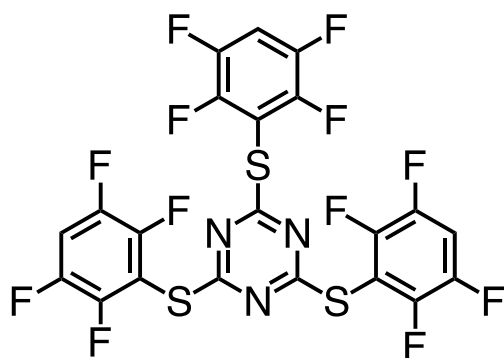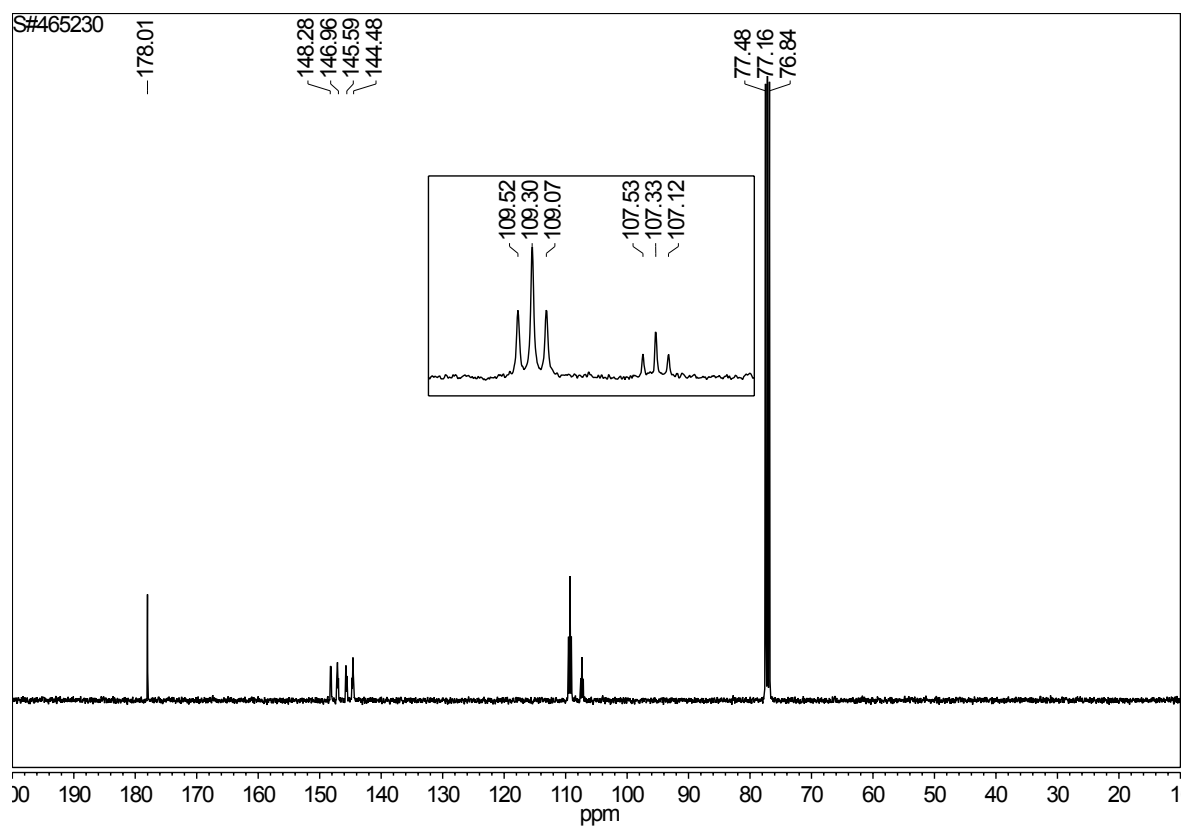

Figure S 27. SCXRD structure of 2,4,6-tris(phenylthio)-1,3,5-triazine (1): CCDC-1403546

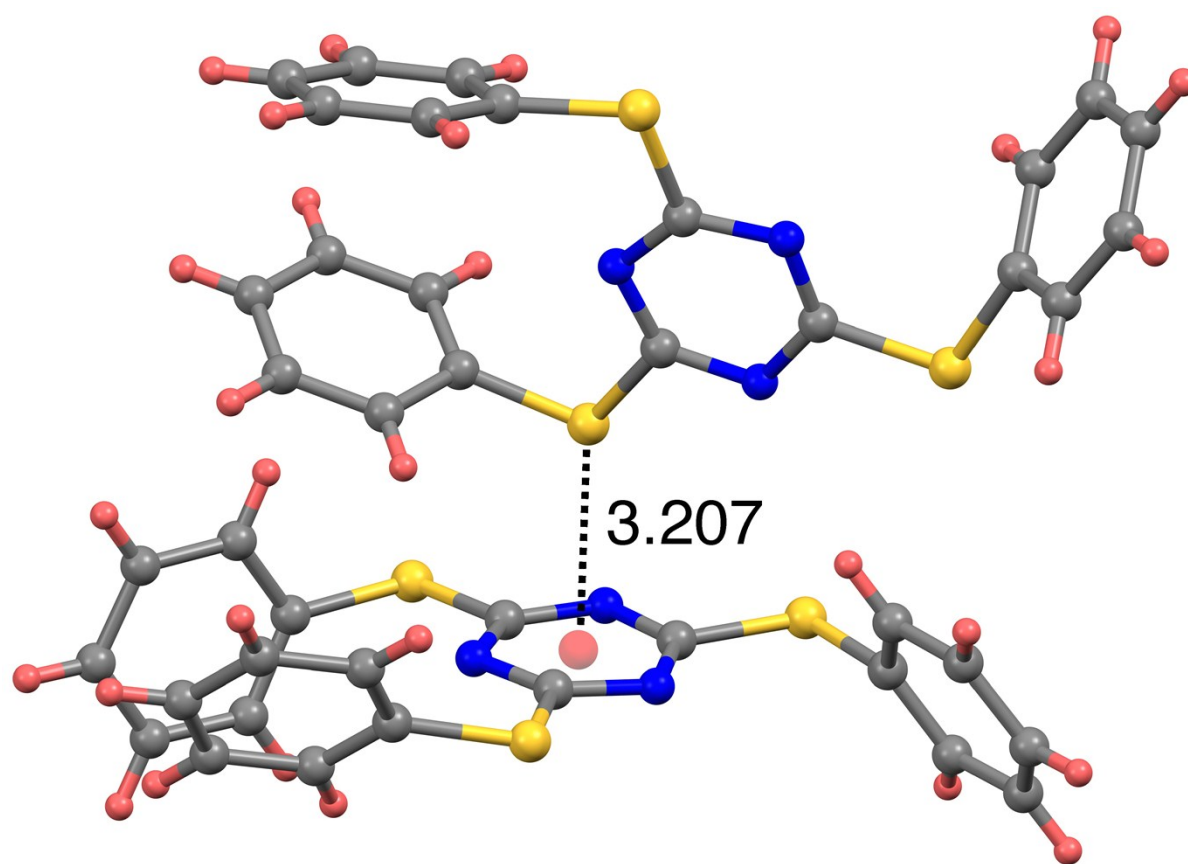

Color code: S, yellow; C, grey; H, salmon; N, blue. Selected distances (Å): S(1A)-C(1A), 1.749(3); S(1A)-C(4A), 1.772(3); S(2A)-C(2A), 1.761(3); S(2A)-C(10A), 1.774(3); S(3A)-C(3A), 1.749(3); S(3A)-C(16A), 1.767(3); N(1A)-C(3A), 1.333(4); N(1A)-C(1A), 1.333(4); N(2A)-C(2A), 1.329(4); N(2A)-C(1A), 1.349(4); N(3A)-C(3A), 1.331(4); N(3A)-C(2A), 1.341(4). Selected angles (deg): C(1A)-S(1A)-C(4A), 103.64(14); C(2A)-S(2A)-C(10A), 104.88(15); C(3A)-S(3A)-C(16A), 104.20(15); C(3A)-N(1A)-C(1A), 113.2(3); C(2A)-N(2A)-C(1A), 112.6(3); C(3A)-N(3A)-C(2A), 113.6(3); N(1A)-C(1A)-N(2A), 127.0(3); N(1A)-C(1A)-S(1A), 120.4(2); N(2A)-C(1A)-S(1A), 112.6(2); N(2A)-C(2A)-N(3A), 126.9(3); N(2A)-C(2A)-S(2A), 121.4(2); N(3A)-C(2A)-S(2A), 111.7(2); N(3A)-C(3A)-N(1A), 126.6(3); N(3A)-C(3A)-S(3A), 112.2(2); N(1A)-C(3A)-S(3A), 121.2(2).

Figure S 28. SCXRD structure of 2,4,6-tris(p-tolylthio)-1,3,5-triazine (2): CCDC-1403547

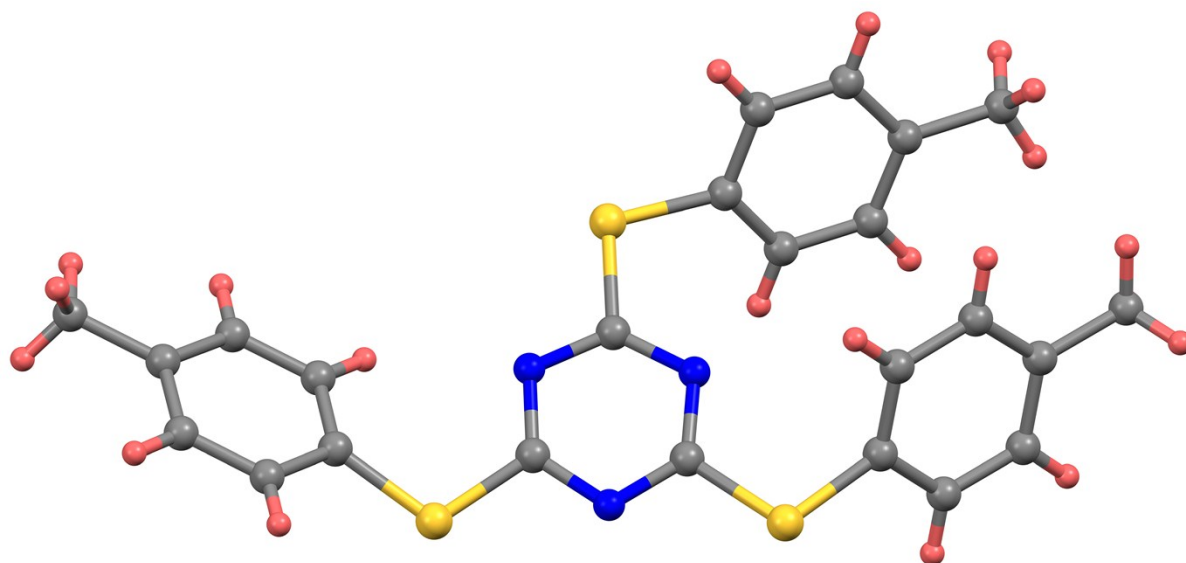

Color code: S, yellow; C, grey; H, salmon; N, blue. Selected distances (Å): S(1)-C(1), 1.746(3); S(1)-C(4), 1.777(2); S(2)-C(2), 1.756(2); S(2)-C(11), 1.774(3); S(3)-C(3), 1.755(3); S(3)-C(18), 1.774(3); N(1)-C(1), 1.338(3); N(1)-C(3), 1.343(3); N(2)-C(2), 1.333(3); N(2)-C(1), 1.343(3); N(3)-C(3), 1.335(3); N(3)-C(2), 1.339(3). Selected angles (deg): C(1)-S(1)-C(4), 109.89(12); C(2)-S(2)-C(11), 105.28(12); C(3)-S(3)-C(18), 104.05(12); C(1)-N(1)-C(3), 112.9(2); C(2)-N(2)-C(1), 113.9(2); C(3)-N(3)-C(2), 113.3(2); N(1)-C(1)-N(2), 126.4(2); N(1)-C(1)-S(1), 122.70(19); N(2)-C(1)-S(1), 110.83(18); N(2)-C(2)-N(3), 126.3(2); N(2)-C(2)-S(2), 112.64(18); N(3)-C(2)-S(2), 120.99(19); N(3)-C(3)-N(1), 127.1(2); N(3)-C(3)-S(3), 120.40(18); N(1)-C(3)-S(3), 112.46(18).

Figure S 29. SCXRD structure of 2,4,6-tris((4-chlorophenyl)thio)-1,3,5-triazine (3): CCDC-1403548

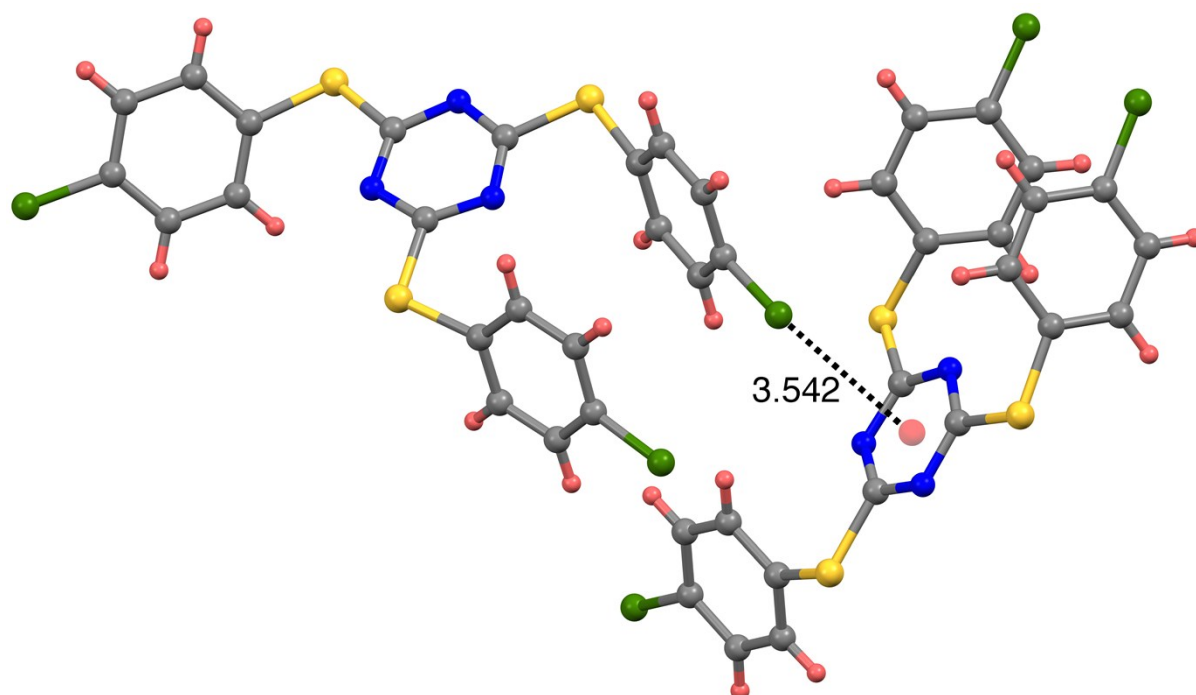

Color code: S, yellow; Cl, green; C, grey; H, salmon; N, blue. Selected distances (Å): Cl(1)-C(7), 1.740(3); Cl(2)-C(13), 1.741(3); Cl(3)-C(19), 1.741(3); S(1)-C(1), 1.753(3); S(1)-C(4), 1.778(3); S(2)-C(2), 1.751(3); S(2)-C(10), 1.776(3); S(3)-C(3), 1.752(3); S(3)-C(16), 1.772(3); N(1)-C(1), 1.329(4); N(1)-C(3), 1.336(3); N(2)-C(2), 1.336(4); N(2)-C(1), 1.346(3); N(3)-C(2), 1.331(4); N(3)-C(3), 1.336(3). Selected angles (deg): C(1)-S(1)-C(4), 105.44(13); C(2)-S(2)-C(10), 102.15(13); C(3)-S(3)-C(16), 104.02(13); C(1)-N(1)-C(3), 112.9(2); C(2)-N(2)-C(1), 113.5(2); C(2)-N(3)-C(3), 112.9(2); N(1)-C(1)-N(2), 126.4(3); N(1)-C(1)-S(1), 121.6(2); N(2)-C(1)-S(1), 112.0(2); N(3)-C(2)-N(2), 126.7(3); N(3)-C(2)-S(2), 119.8(2); N(2)-C(2)-S(2), 113.5(2); N(3)-C(3)-N(1), 127.5(3); N(3)-C(3)-S(3), 119.5(2); N(1)-C(3)-S(3), 113.0(2).

Figure S 30. SCXRD structure of 2,4,6-tris((3-nitrophenyl)thio)-1,3,5-triazine (4): CCDC-1403549

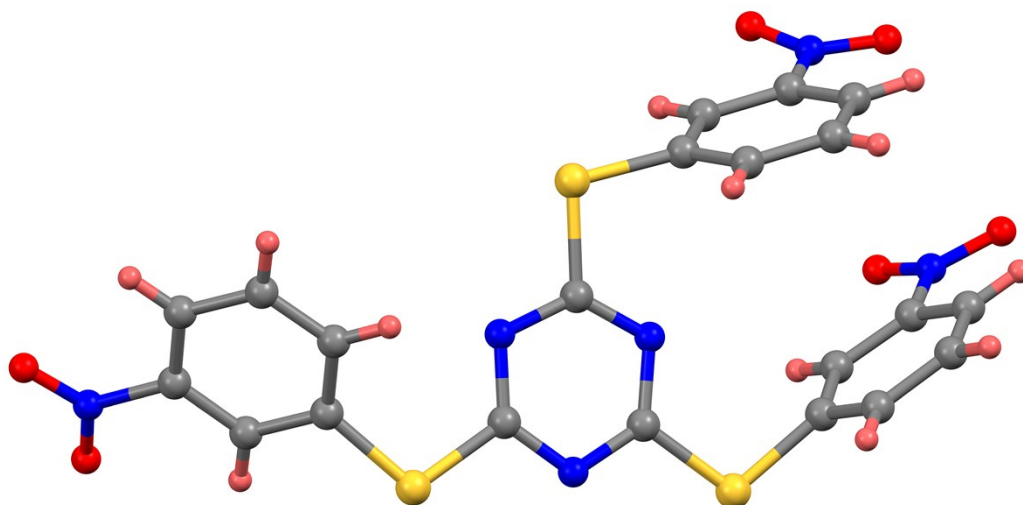

Color code: S, yellow; O, red; C, grey; H, salmon; N, blue. Selected distances (Å): S(1)-C(1), 1.756(3); S(1)-C(4), 1.758(3); S(2)-C(2), 1.746(3); S(2)-C(10), 1.774(3); S(3)-C(3), 1.741(3); S(3)-C(16), 1.770(4); O(1)-N(4), 1.205(4); O(2)-N(4), 1.216(4); O(3)-N(5), 1.211(4); O(4)-N(5), 1.183(4); O(5)-N(6), 1.206(5); O(6)-N(6), 1.194(5); N(1)-C(1), 1.323(4); N(1)-C(3), 1.345(4); N(2)-C(1), 1.325(4); N(2)-C(2), 1.330(4); N(3)-C(3), 1.320(4); N(3)-C(2), 1.326(4); N(4)-C(6), 1.468(4); N(5)-C(14), 1.460(5); N(6)-C(20), 1.458(5). Selected angles (deg): C(1)-S(1)-C(4), 105.77(16); C(2)-S(2)-C(10), 103.26(17); C(3)-S(3)-C(16), 101.88(17); C(1)-N(1)-C(3), 112.5(3); C(1)-N(2)-C(2), 112.9(3); C(3)-N(3)-C(2), 113.2(3); O(1)-N(4)-O(2), 123.9(4); O(1)-N(4)-C(6), 118.0(4); O(2)-N(4)-C(6), 118.2(4); O(4)-N(5)-O(3), 122.7(4); O(4)-N(5)-C(14), 118.4(4); O(3)-N(5)-C(14), 118.9(4); O(6)-N(6)-O(5), 123.5(5); O(6)-N(6)-C(20), 119.0(5); O(5)-N(6)-C(20), 117.3(5); N(1)-C(1)-N(2), 127.5(3); N(1)-C(1)-S(1), 121.5(3); N(2)-C(1)-S(1), 110.9(2); N(3)-C(2)-N(2), 127.0(3); N(3)-C(2)-S(2), 120.2(3); N(2)-C(2)-S(2), 112.8(3); N(3)-C(3)-N(1), 126.9(3); N(3)-C(3)-S(3), 120.4(3); N(1)-C(3)-S(3), 112.7(3).

Figure S 31. SCXRD structure of 2,4,6-tris((2-methyl-5-nitrophenyl)thio)-1,3,5-triazine (5): CCDC-1403550

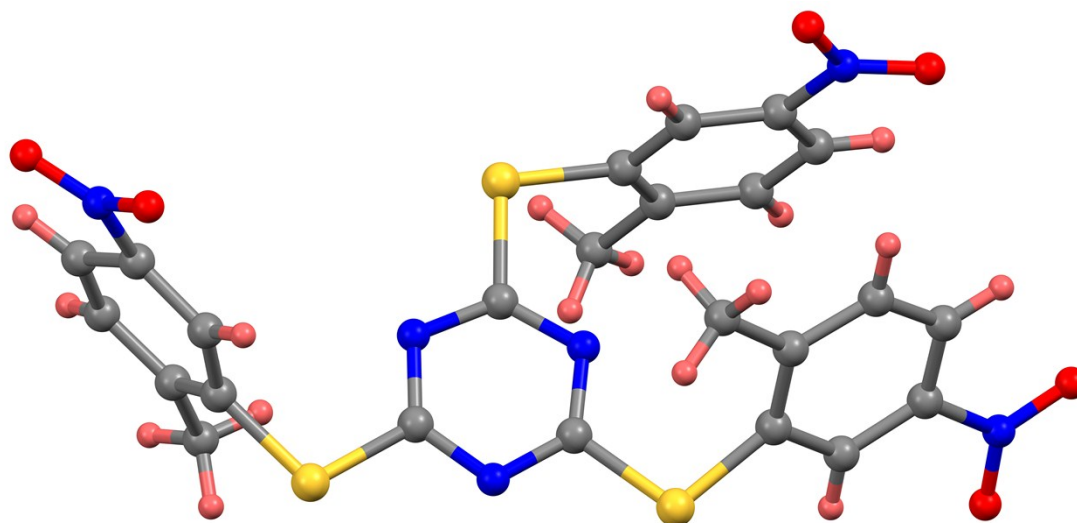

Color code: S, yellow; O, red; C, grey; H, salmon; N, blue. Selected distances (Å): S(1)-C(1), 1.749(3); S(1)-C(4), 1.774(3); S(1)-C(4B), 1.776(5); S(2)-C(2), 1.753(2); S(2)-C(11), 1.776(3); S(3)-C(3), 1.751(3); S(3)-C(18), 1.777(3); N(5)-O(3), 1.213(3); N(5)-O(4), 1.214(3); N(5)-C(16), 1.471(3); N(6)-O(6), 1.210(3); N(6)-O(5), 1.212(2); N(6)-C(23), 1.471(3); N(1)-C(1), 1.327(3); N(1)-C(3), 1.331(3); N(2)-C(2), 1.330(3); N(2)-C(1), 1.337(3); N(3)-C(2), 1.322(3); N(3)-C(3), 1.330(3); N(4)-O(1), 1.210(4); N(4)-O(2), 1.214(4); N(4)-C(9), 1.461(5). Selected angles (deg): C(1)-S(1)-C(4), 106.2(2); C(1)-S(1)-C(4B), 96.9(3); C(2)-S(2)-C(11), 104.15(12); C(3)-S(3)-C(18), 100.59(11); O(3)-N(5)-O(4), 123.8(2); O(3)-N(5)-C(16), 118.2(2); O(4)-N(5)-C(16), 118.0(2); O(6)-N(6)-O(5), 123.6(3); O(6)-N(6)-C(23), 118.0(2); O(5)-N(6)-C(23), 118.4(2); C(1)-N(1)-C(3), 113.0(2); C(2)-N(2)-C(1), 113.0(2); C(2)-N(3)-C(3), 113.0(2); N(1)-C(1)-N(2), 126.7(2); N(1)-C(1)-S(1), 121.16(18); N(2)-C(1)-S(1), 112.2(2); N(3)-C(2)-N(2), 127.1(2); N(3)-C(2)-S(2), 120.38(19); N(2)-C(2)-S(2), 112.48(19); N(3)-C(3)-N(1), 127.1(2); N(3)-C(3)-S(3), 118.58(19); N(1)-C(3)-S(3), 114.29(17); O(1)-N(4)-O(2), 124.5(5); O(1)-N(4)-C(9), 112.7(4); O(2)-N(4)-C(9), 122.9(5).



Figure S 32. SCXRD structure of 2,4,6-tris(2,6-dimethylphenylthio)-1,3,5-triazine (6):  
CCDC-1436792

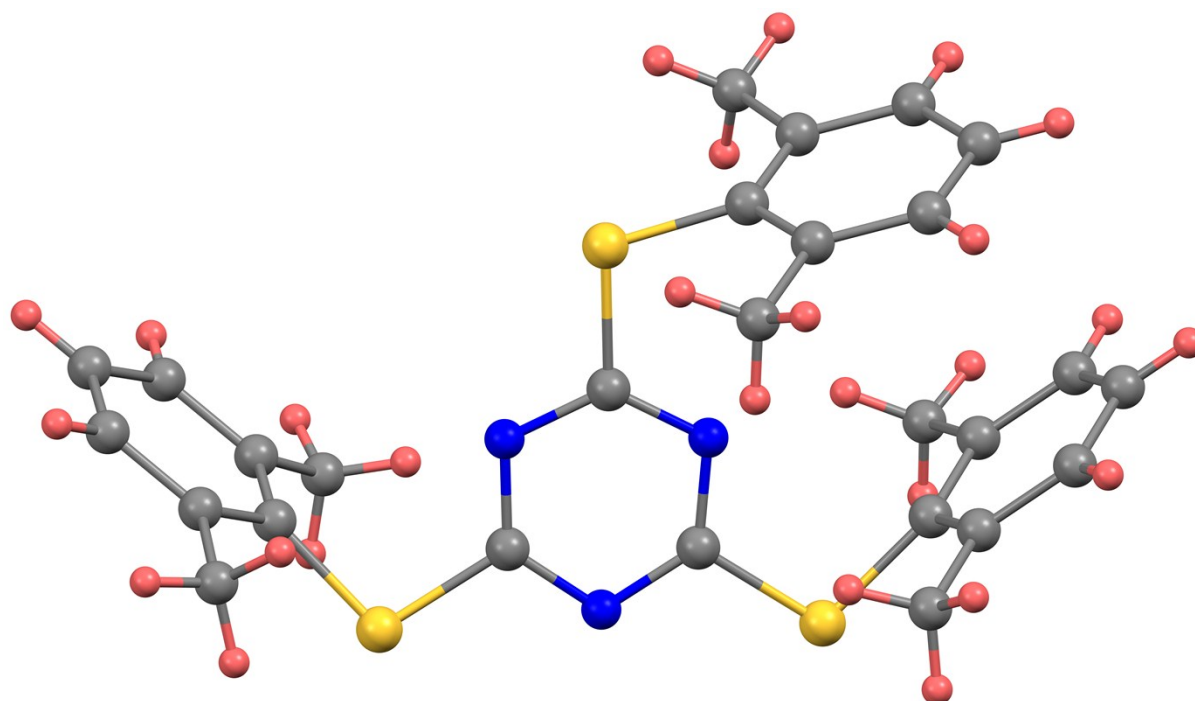

Color code: S, yellow; C, grey; H, salmon; N, blue. Selected distances (Å): S(1)-C(4), 1.722(7); S(1)-C(1), 1.740(3); S(1)-C(4A), 1.829(10); S(2)-C(2), 1.752(3); S(2)-C(12), 1.755(7); S(2)-C(12A), 1.757(10); S(3)-C(20A), 1.718(8); S(3)-C(3), 1.750(3); S(3)-C(20), 1.781(5); N(1)-C(2), 1.327(3); N(1)-C(1), 1.334(3); N(2)-C(3), 1.333(3); N(2)-C(2), 1.333(3); N(3)-C(1), 1.324(3); N(3)-C(3), 1.326(3). Selected angles (deg): C(4)-S(1)-C(1), 106.8(4); C(1)-S(1)-C(4A), 97.2(6); C(2)-S(2)-C(12), 101.5(6); C(2)-S(2)-C(12A), 106.7(9); C(20A)-S(3)-C(3), 104.7(10); C(3)-S(3)-C(20), 100.5(7); C(2)-N(1)-C(1), 113.3(2); C(3)-N(2)-C(2), 112.9(2); C(1)-N(3)-C(3), 113.4(2); N(3)-C(1)-N(1), 126.6(2); N(3)-C(1)-S(1), 119.69(18); N(1)-C(1)-S(1), 113.68(19); N(1)-C(2)-N(2), 126.8(2); N(1)-C(2)-S(2), 119.8(2); N(2)-C(2)-S(2), 113.4(2); N(3)-C(3)-N(2), 126.9(2); N(3)-C(3)-S(3), 118.9(2); N(2)-C(3)-S(3), 114.2(2); C(5)-C(4)-C(9), 120.0; C(5)-C(4)-S(1), 118.2(6); C(9)-C(4)-S(1), 121.7(6);

Figure S 33. SCXRD structure of 2,4,6-tris(2,3,4,5,6-pentamethyl phenylthio)-1,3,5-triazine (7): CCDC-1436793

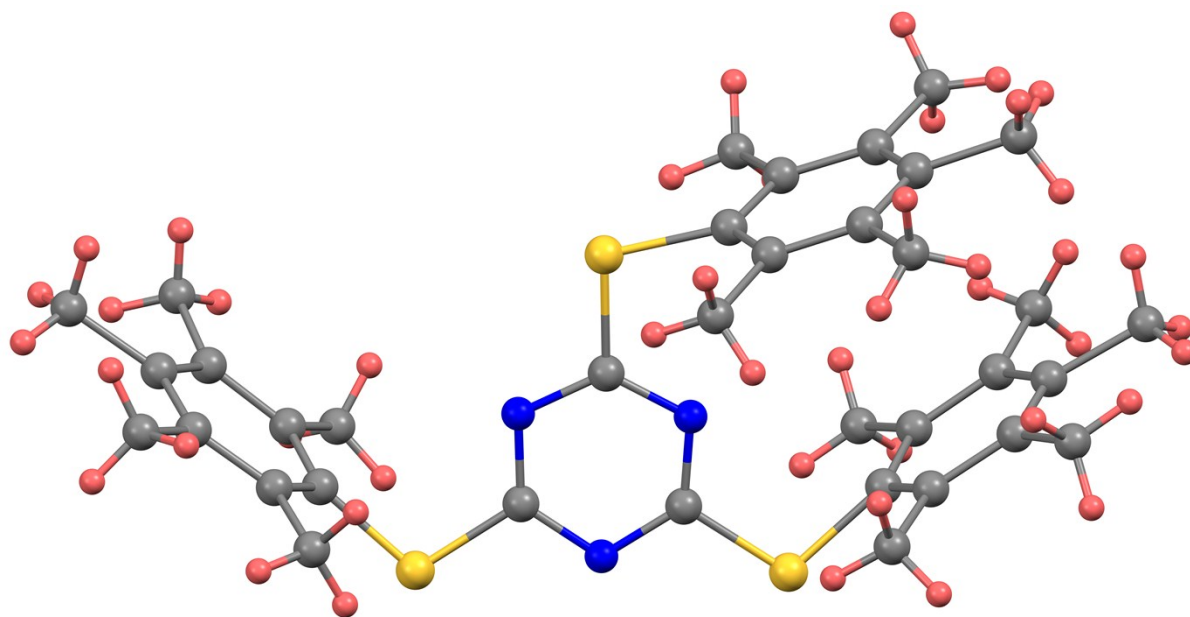

Color code: S, yellow; C, grey; H, salmon; N, blue. Selected distances (Å): S(1)-C(1), 1.749(5); S(1)-C(4), 1.774(6); S(2)-C(2), 1.745(6); S(2)-C(15), 1.784(5); S(3)-C(3), 1.734(5); S(3)-C(26), 1.788(5); N(1)-C(2), 1.345(6); N(1)-C(1), 1.348(6); N(2)-C(2), 1.310(6); N(2)-C(3), 1.326(6); N(3)-C(1), 1.309(7); N(3)-C(3), 1.348(6). Selected angles (deg): C(1)-S(1)-C(4), 104.3(3); C(2)-S(2)-C(15), 103.4(3); C(3)-S(3)-C(26), 103.9(3); C(2)-N(1)-C(1), 113.0(5); C(2)-N(2)-C(3), 114.3(4); C(1)-N(3)-C(3), 114.1(5); N(3)-C(1)-N(1), 126.2(5); N(3)-C(1)-S(1), 122.0(5); N(1)-C(1)-S(1), 111.8(5); N(2)-C(2)-N(1), 126.6(5); N(2)-C(2)-S(2), 119.8(4); N(1)-C(2)-S(2), 113.6(5); N(2)-C(3)-N(3), 125.7(5); N(2)-C(3)-S(3), 119.4(4); N(3)-C(3)-S(3), 114.9(4); C(5)-C(4)-C(9), 121.2(6); C(5)-C(4)-S(1), 120.0(5); C(9)-C(4)-S(1), 118.7(5).

Figure S 34. SCXRD structure of 2,4,6-tris((2,3,5,6-tetrafluorophenyl)thio)-1,3,5-triazine (8): CCDC-1452878

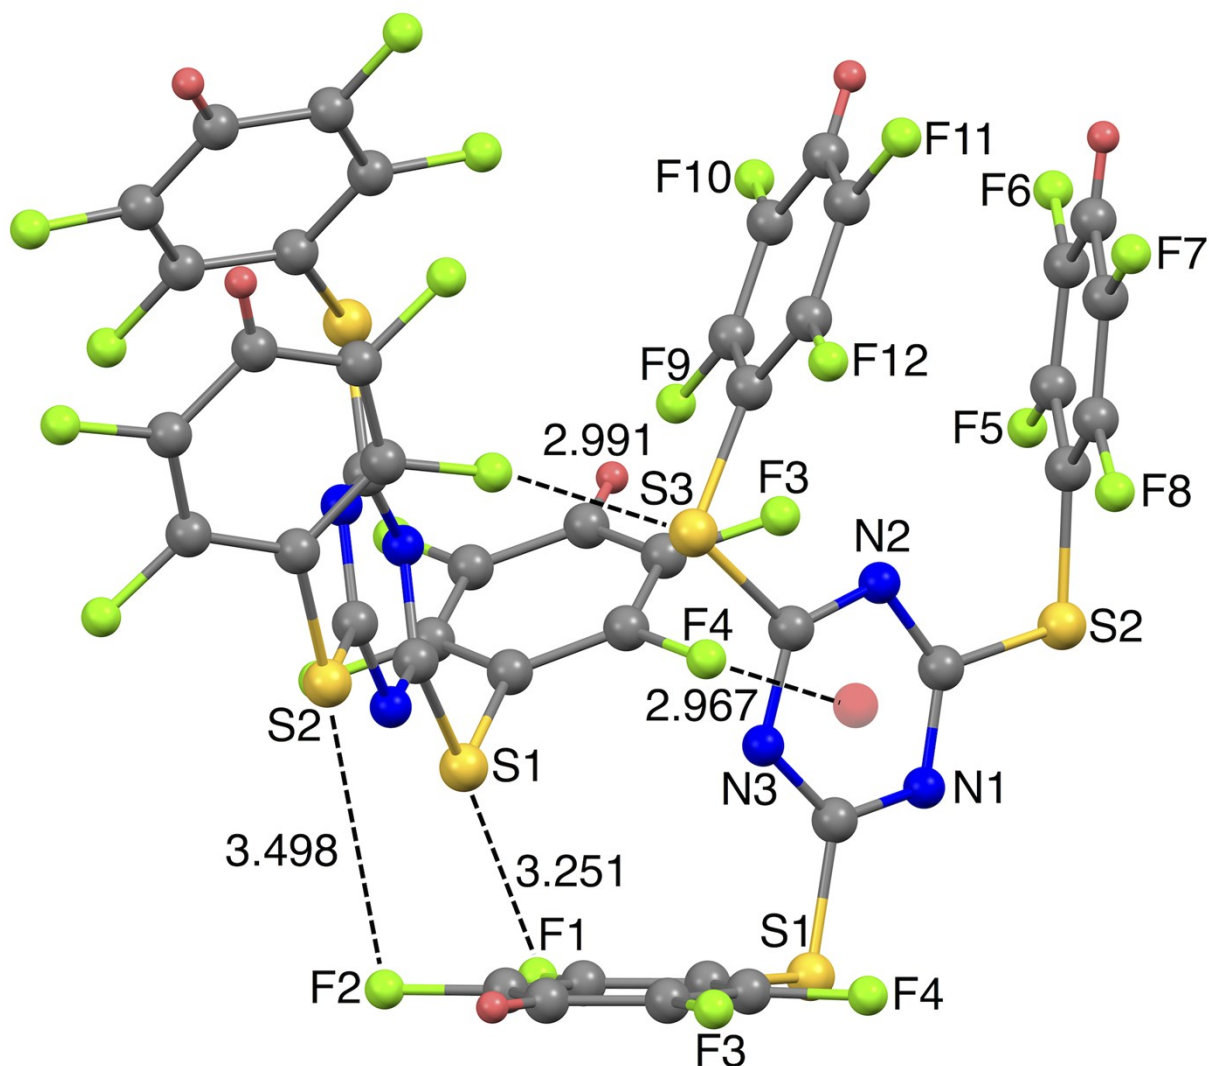

Color code: S, yellow; C, grey; H, salmon; N, blue; F, green. Selected distances (Å): S(1)-C(1), 1.747(6); S(1)-C(4), 1.757(6); S(2)-C(10), 1.753(6); S(2)-C(2), 1.754(6); S(3)-C(3), 1.750(6); S(3)-C(16), 1.768(7); N(1)-C(2), 1.334(7); N(1)-C(1), 1.336(7); N(2)-C(3), 1.326(7); N(2)-C(2), 1.330(7); N(3)-C(1), 1.327(7); N(3)-C(3), 1.338(7). Selected angles (deg): C(1)-S(1)-C(4), 100.9(3); C(10)-S(2)-C(2), 101.5(3); C(3)-S(3)-C(16), 101.9(3); C(2)-N(1)-C(1), 113.2(5); C(3)-N(2)-C(2), 112.5(5); C(1)-N(3)-C(3), 113.4(5); N(3)-C(1)-N(1), 126.2(5); N(3)-C(1)-S(1), 119.3(4); N(1)-C(1)-S(1), 114.5(5); N(2)-C(2)-N(1), 127.3(5); N(2)-C(2)-S(2), 119.4(5); N(1)-C(2)-S(2), 113.3(5); N(2)-C(3)-N(3), 127.3(5); N(2)-C(3)-S(3), 120.6(5); N(3)-C(3)-S(3), 112.1(4); C(9)-C(4)-C(5), 117.8(6); C(9)-C(4)-S(1), 120.5(6); C(5)-C(4)-S(1), 121.7(6).

Figure S 35. SCXRD structure of 2,4,6-tris(2,6-dimethylphenylthio)-1,3,5-triazine (6·0.5C<sub>6</sub>F<sub>6</sub>): CCDC-1436791

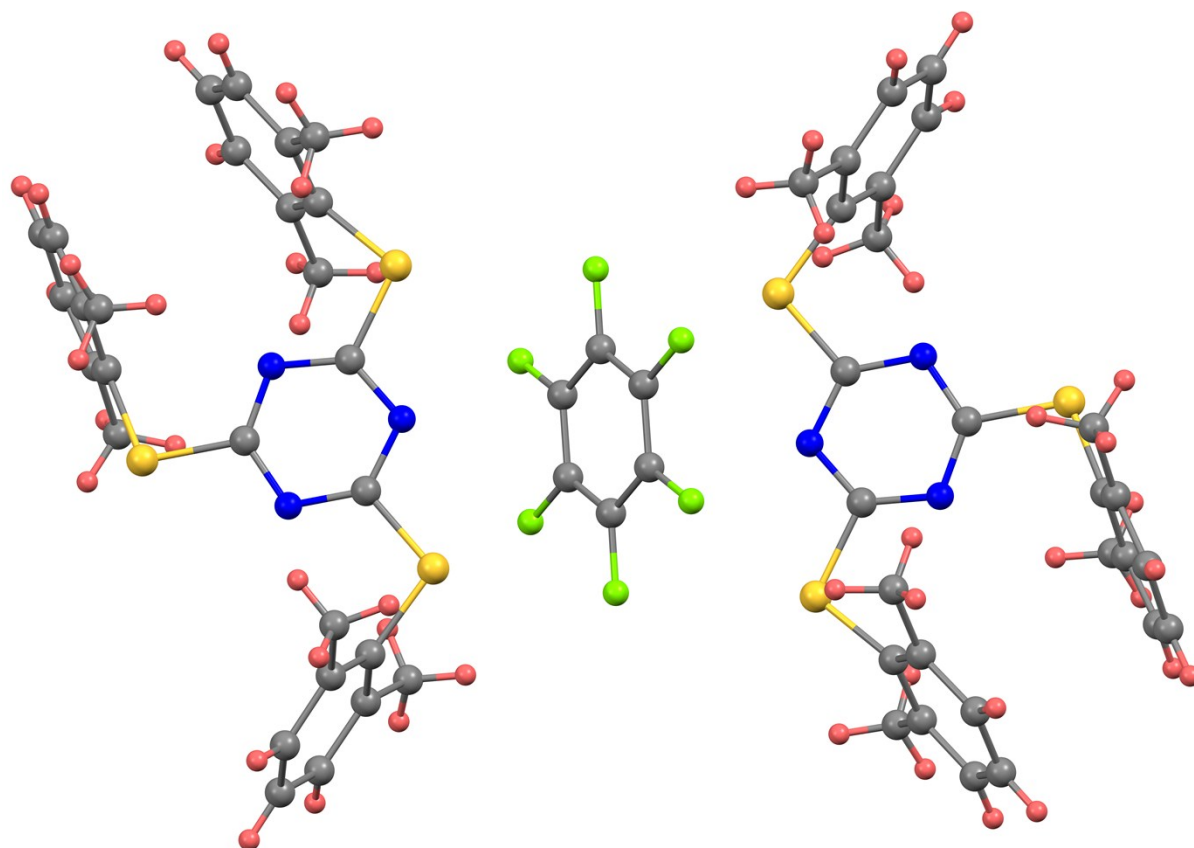

Color code: S, yellow; F, green; C, grey; H, salmon; N, blue. Selected distances (Å): S(1)-C(1), 1.751(3); S(1)-C(4), 1.784(3); S(2)-C(2), 1.757(3); S(2)-C(12), 1.776(3); S(3)-C(3), 1.749(3); S(3)-C(20), 1.777(3); F(1)-C(28), 1.343(4); F(2)-C(29), 1.340(4); F(3)-C(30), 1.334(4); N(1)-C(2), 1.344(4); N(1)-C(1), 1.353(4); N(2)-C(2), 1.325(4); N(2)-C(3), 1.335(3); N(3)-C(1), 1.326(4); N(3)-C(3), 1.341(4). Selected angles (deg): C(1)-S(1)-C(4), 102.66(15); C(2)-S(2)-C(12), 103.74(14); C(3)-S(3)-C(20), 101.66(14); C(2)-N(1)-C(1), 112.8(3); C(2)-N(2)-C(3), 113.6(3); C(1)-N(3)-C(3), 113.4(2); N(3)-C(1)-N(1), 126.6(3); N(3)-C(1)-S(1), 120.3(2); N(1)-C(1)-S(1), 113.1(2); N(2)-C(2)-N(1), 126.8(3); N(2)-C(2)-S(2), 120.0(2); N(1)-C(2)-S(2), 113.2(2); N(2)-C(3)-N(3), 126.7(3); N(2)-C(3)-S(3), 119.9(2); N(3)-C(3)-S(3), 113.4(2).

Figure S 36. TGA of 1.

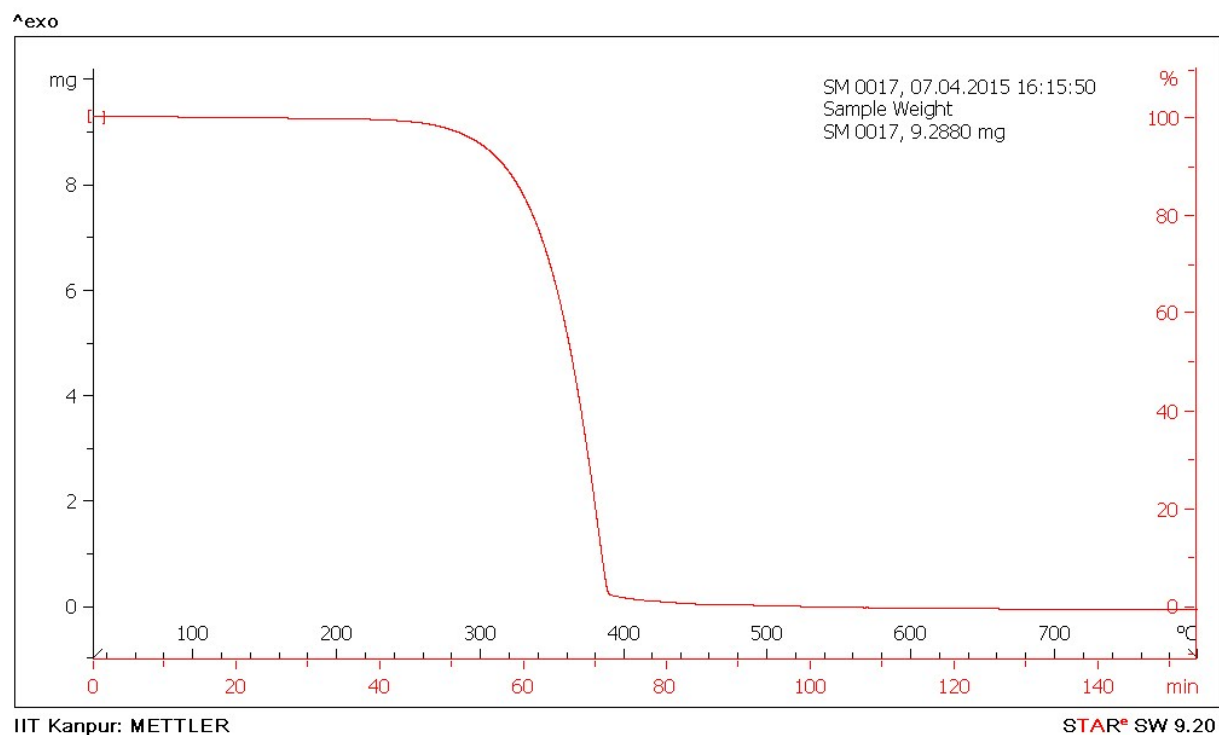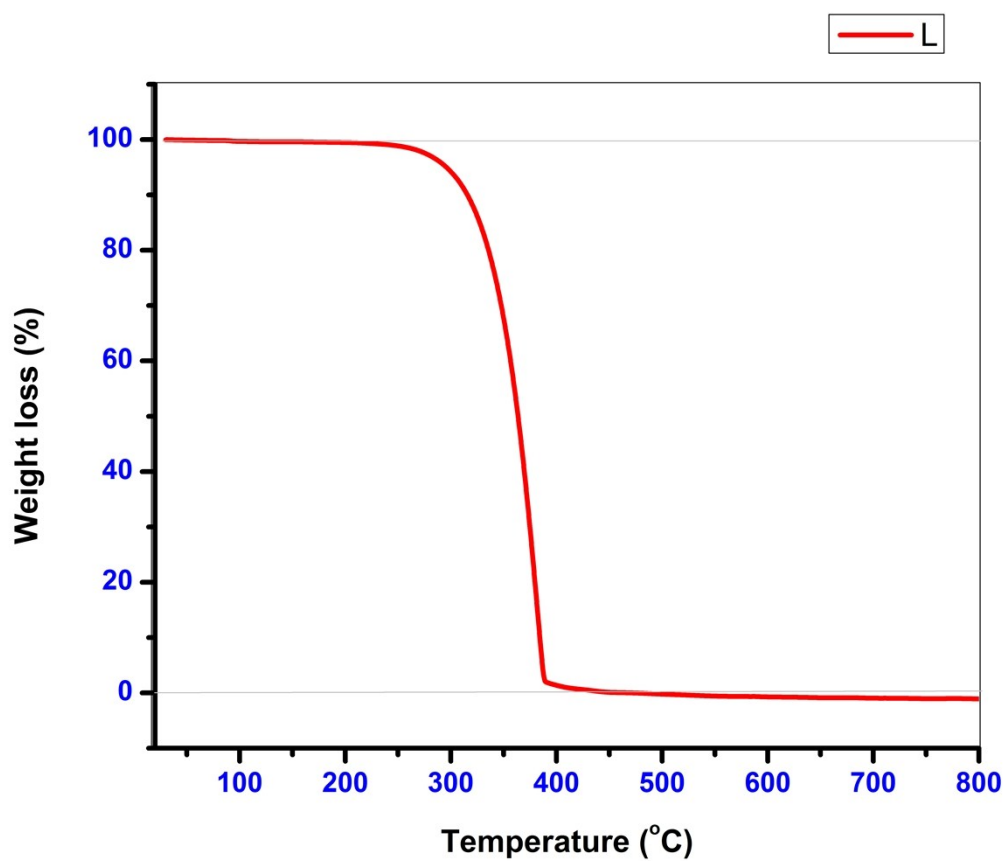

Figure S 37. TGA of 2.

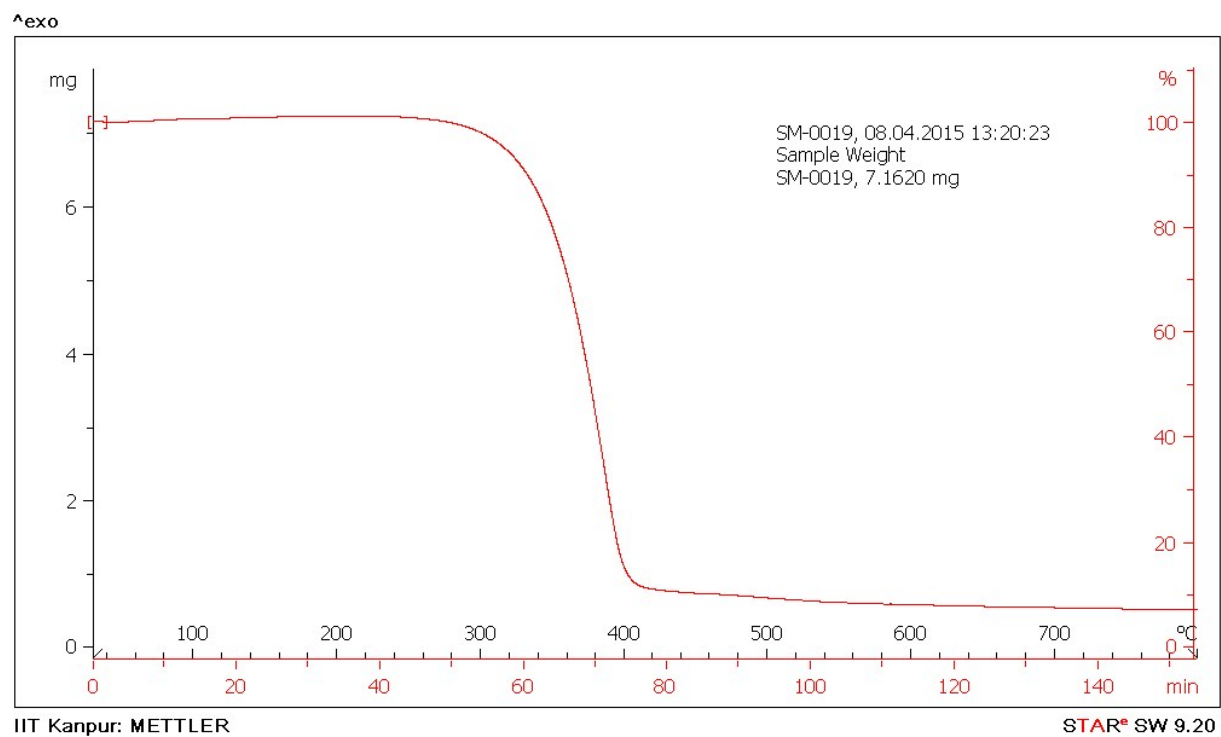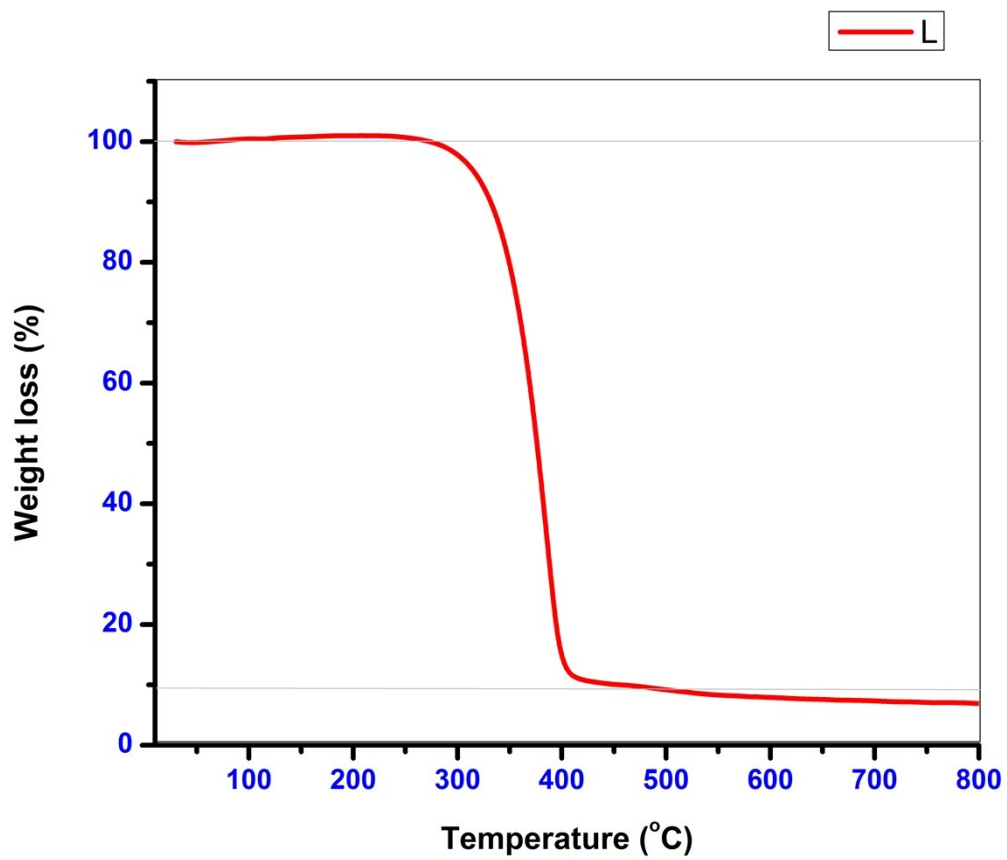

Figure S 38. TGA of 3.

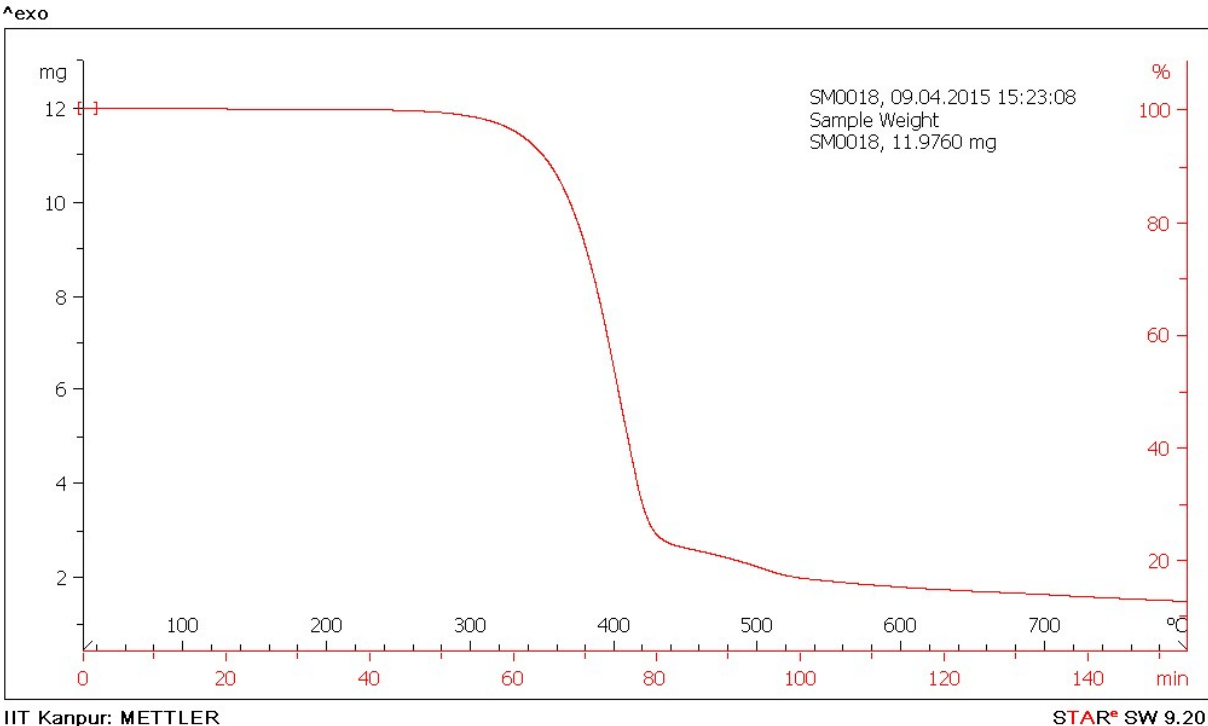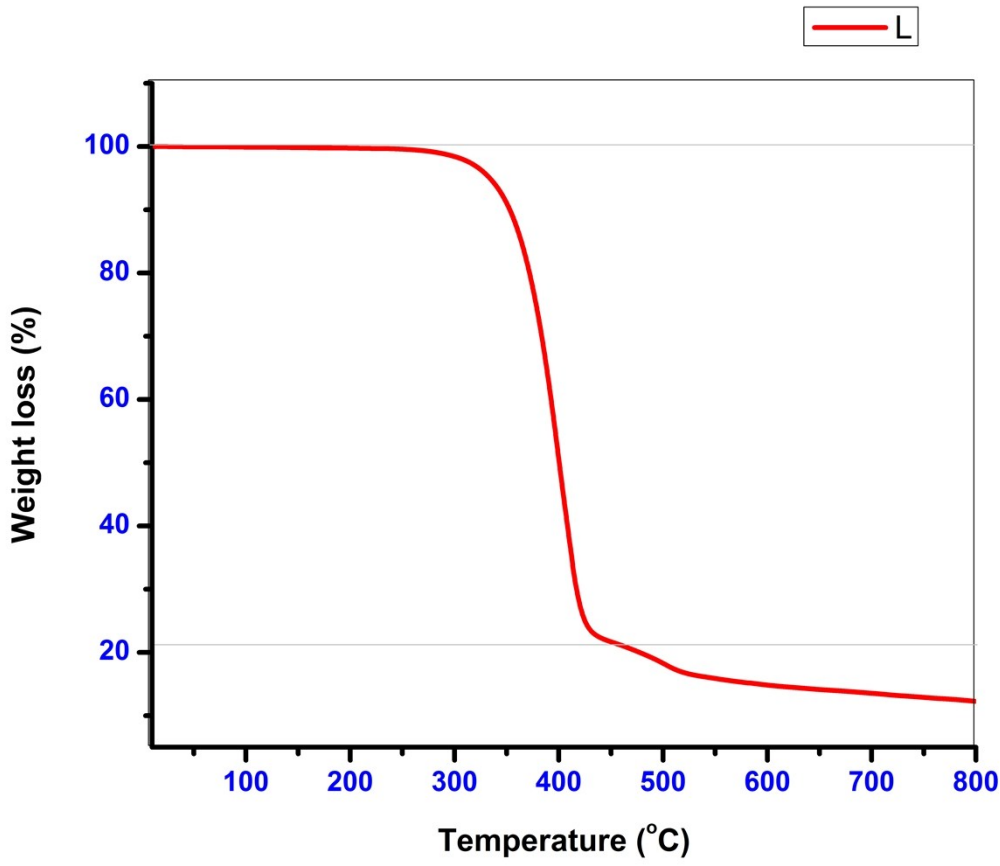

Figure S 39. TGA of 4.

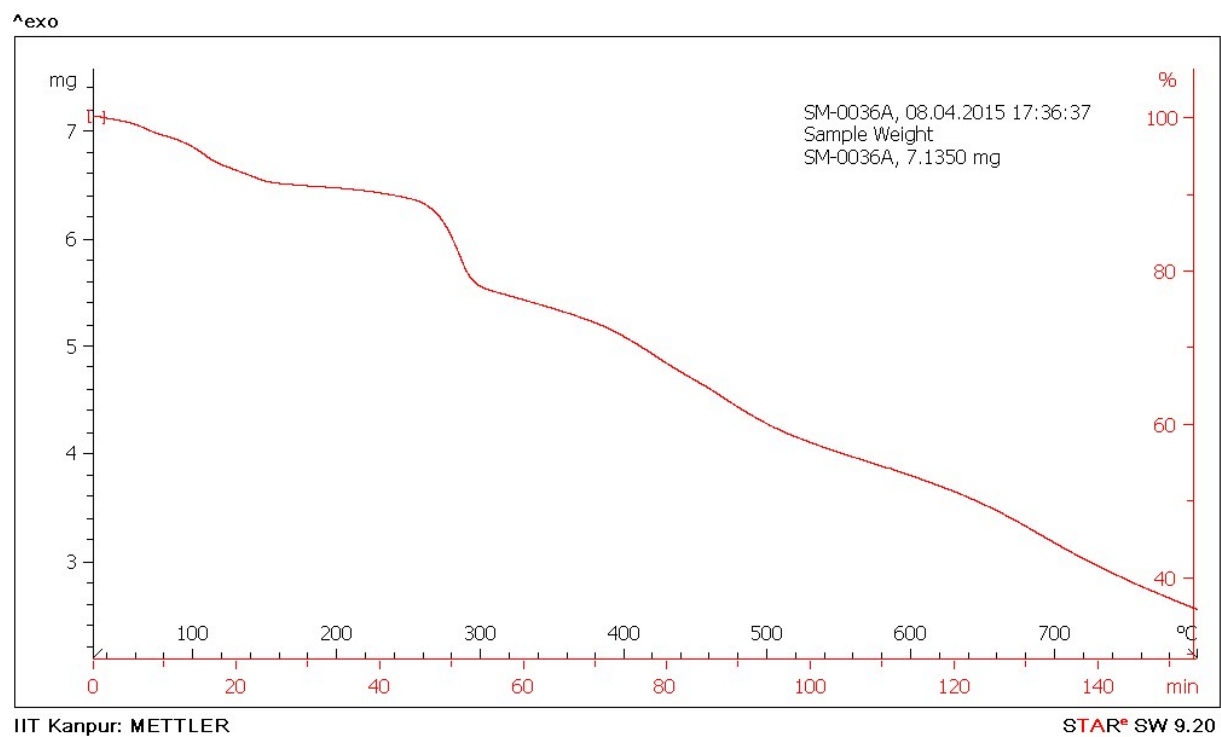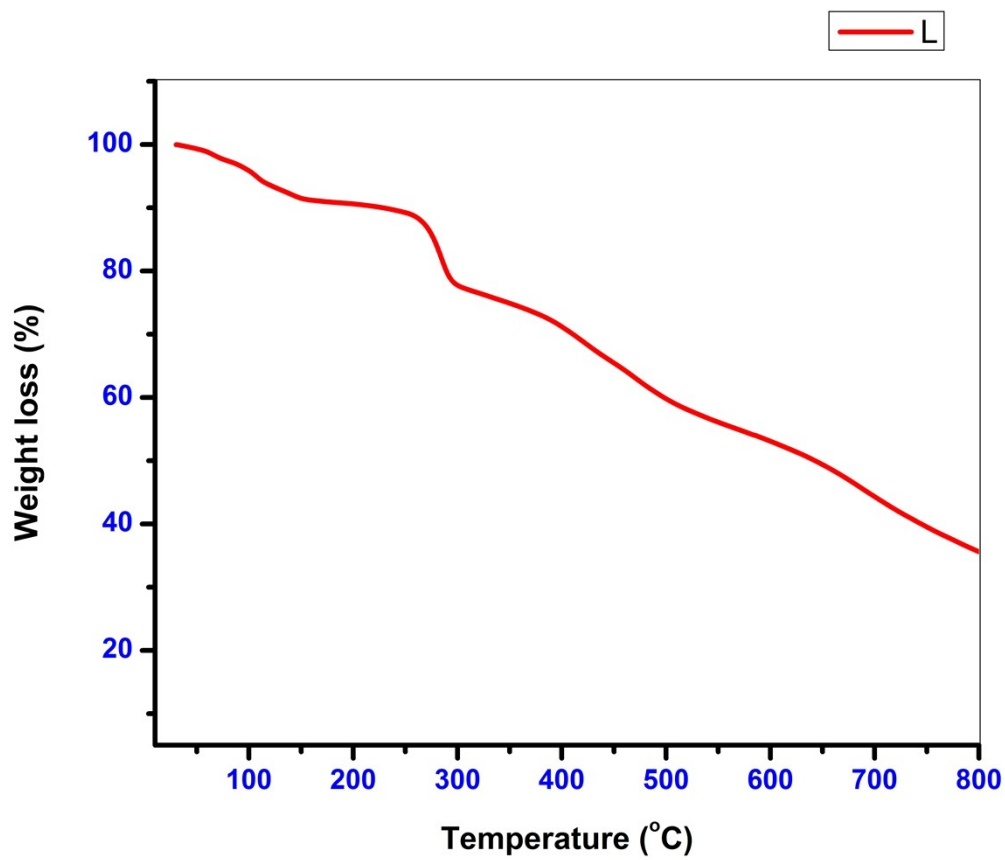



Figure S 40. TGA of 5.

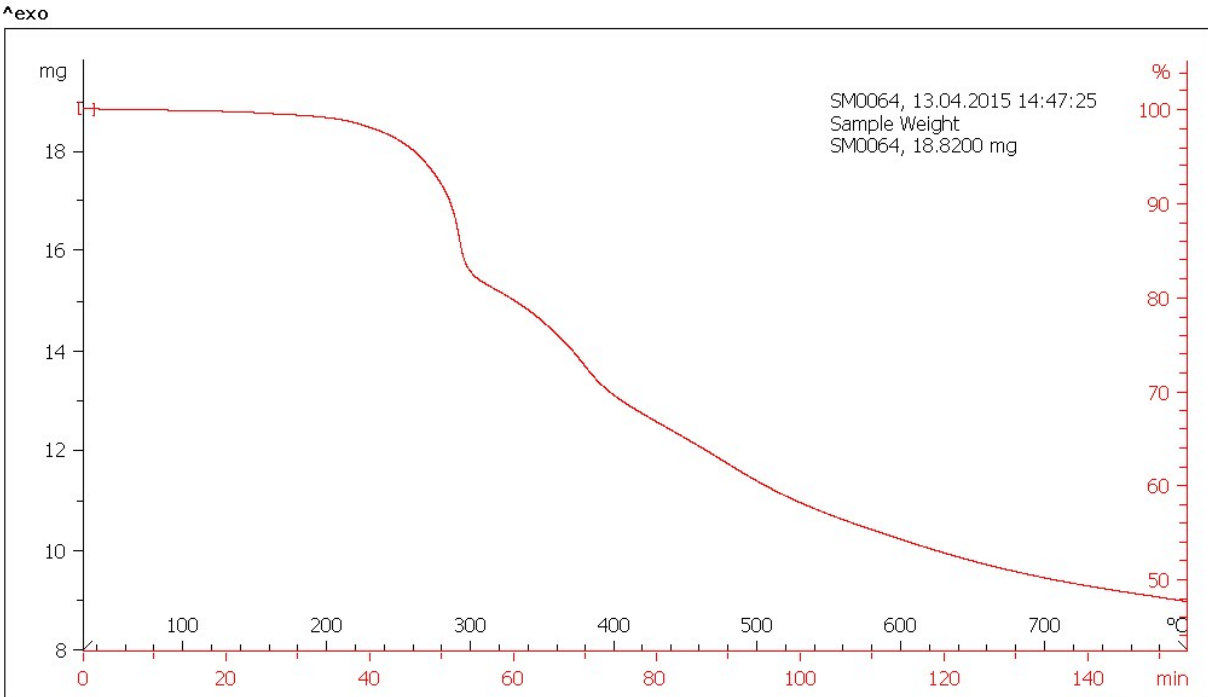

IIT Kanpur: METTLER

STAR® SW 9.20

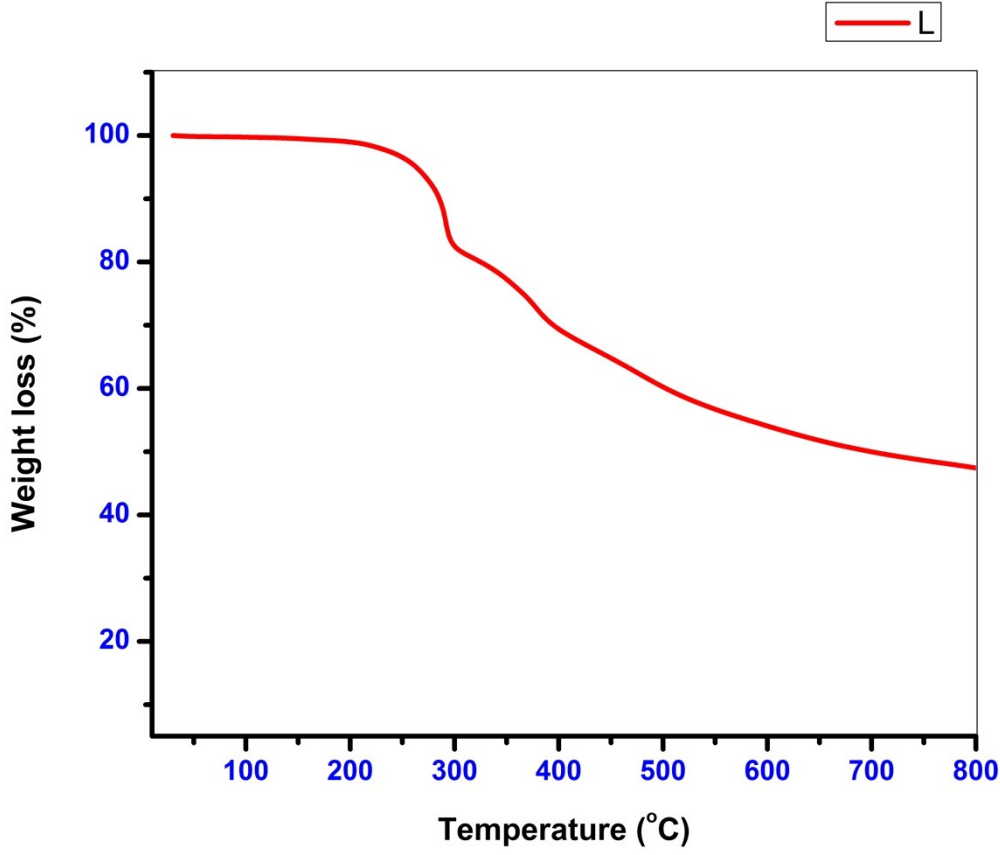

Figure S 41. TGA of 6.

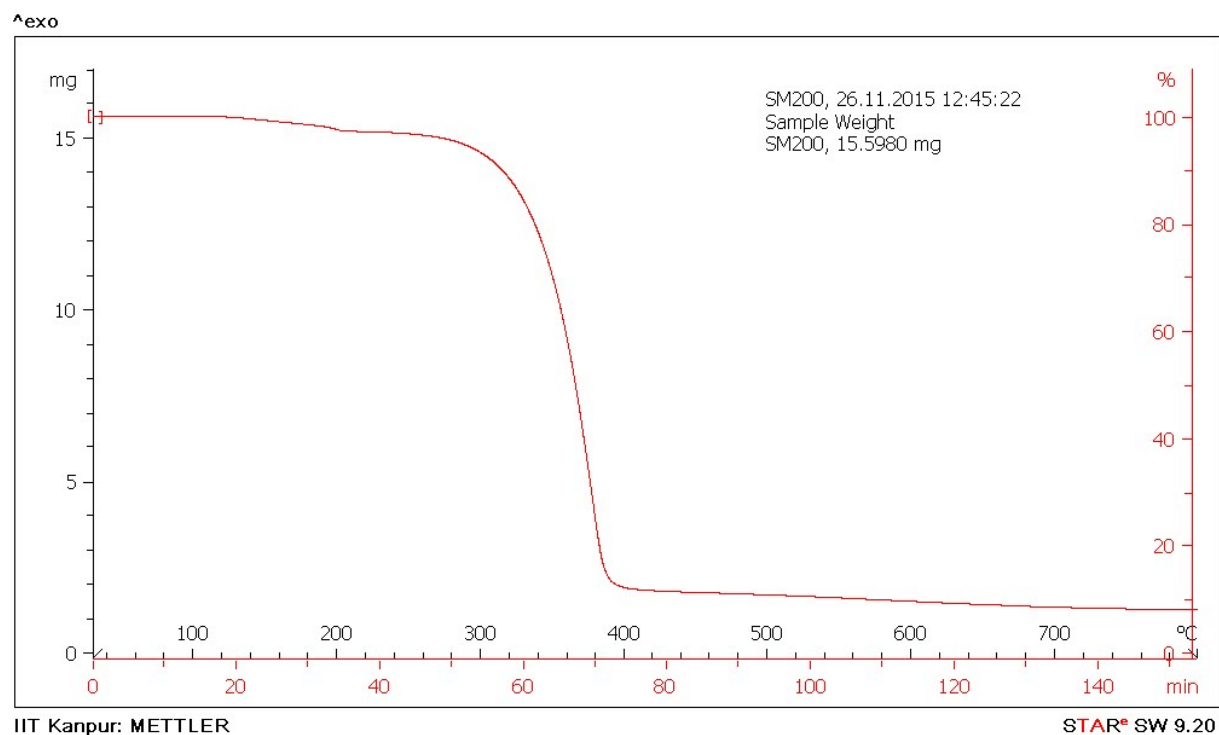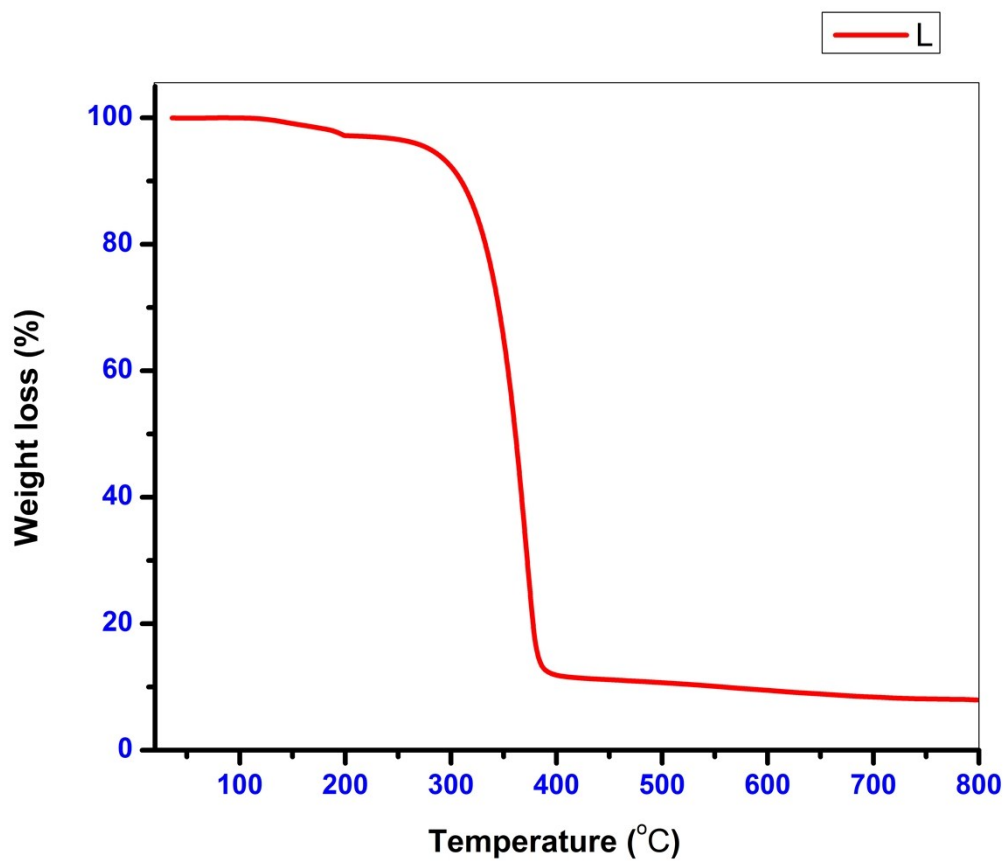

Figure S 42. TGA of 7.

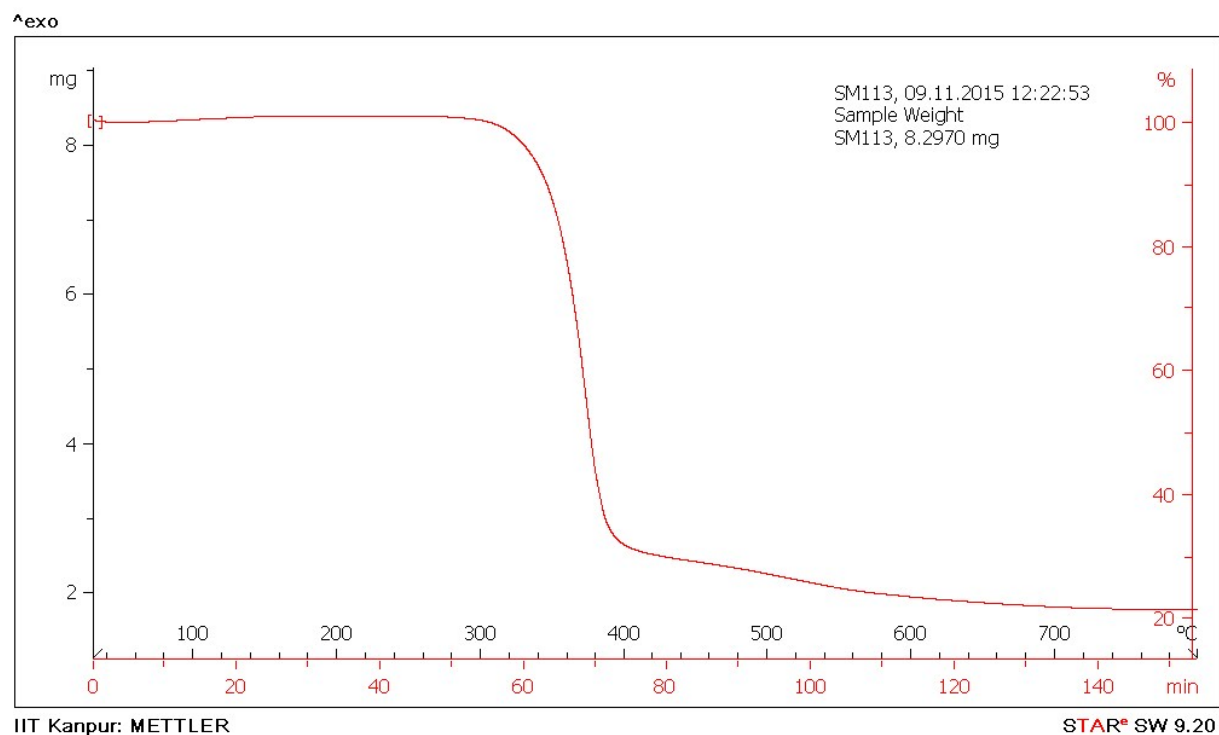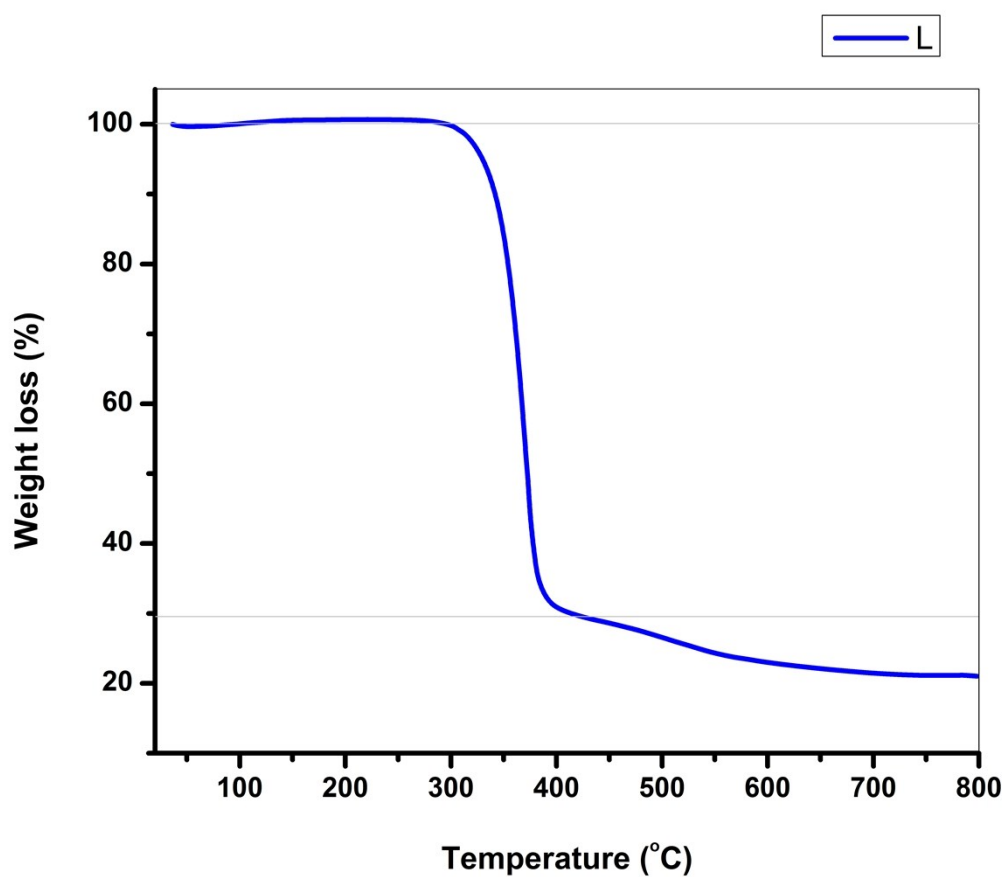

Figure S 43. TGA of 8.

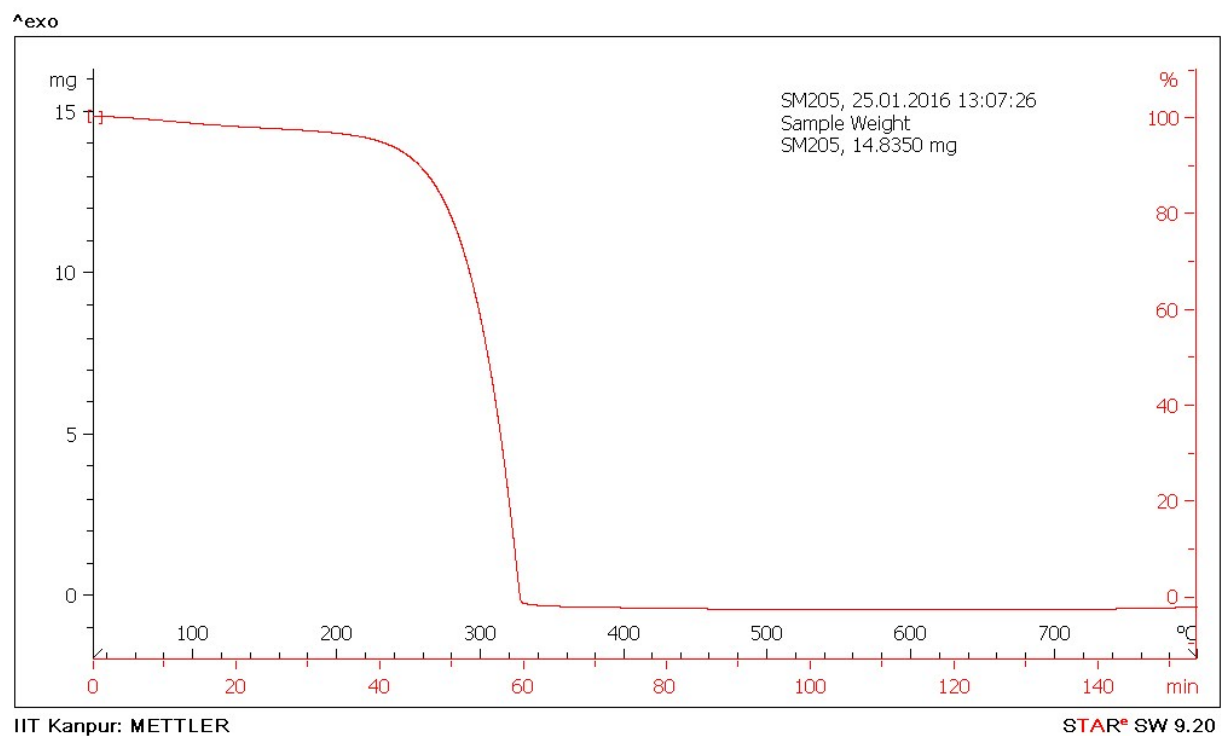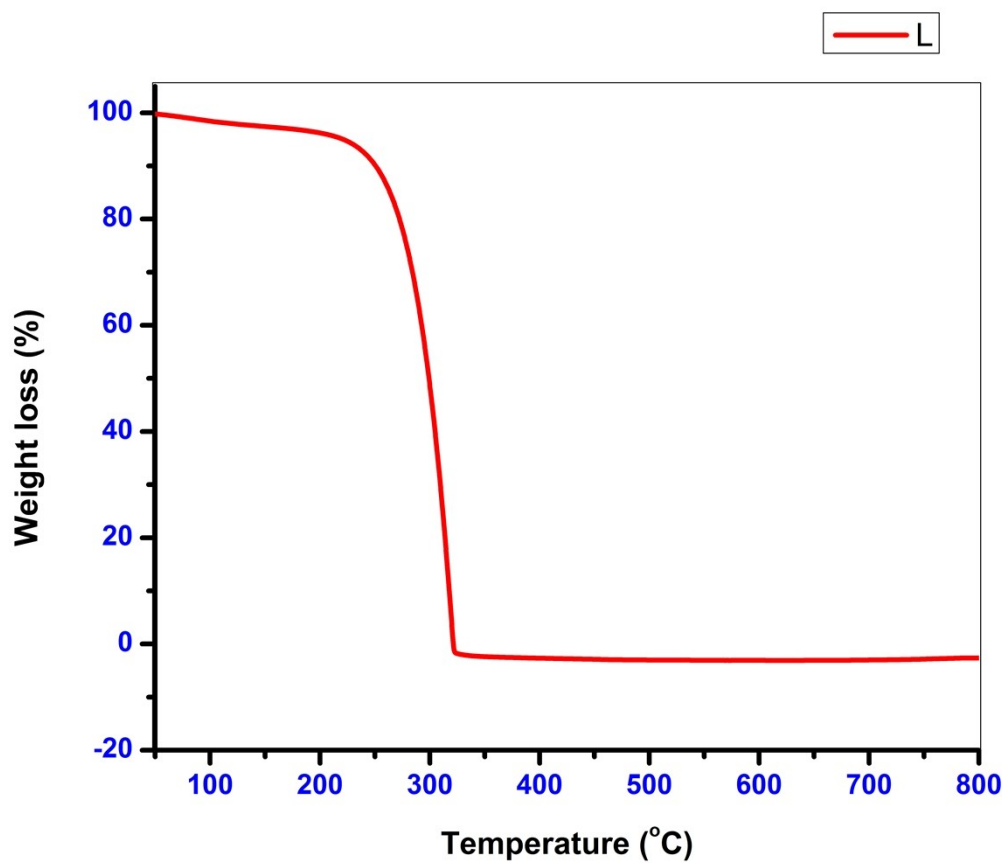

Figure S 44. TGA of 6-0.5C<sub>6</sub>F<sub>6</sub>.

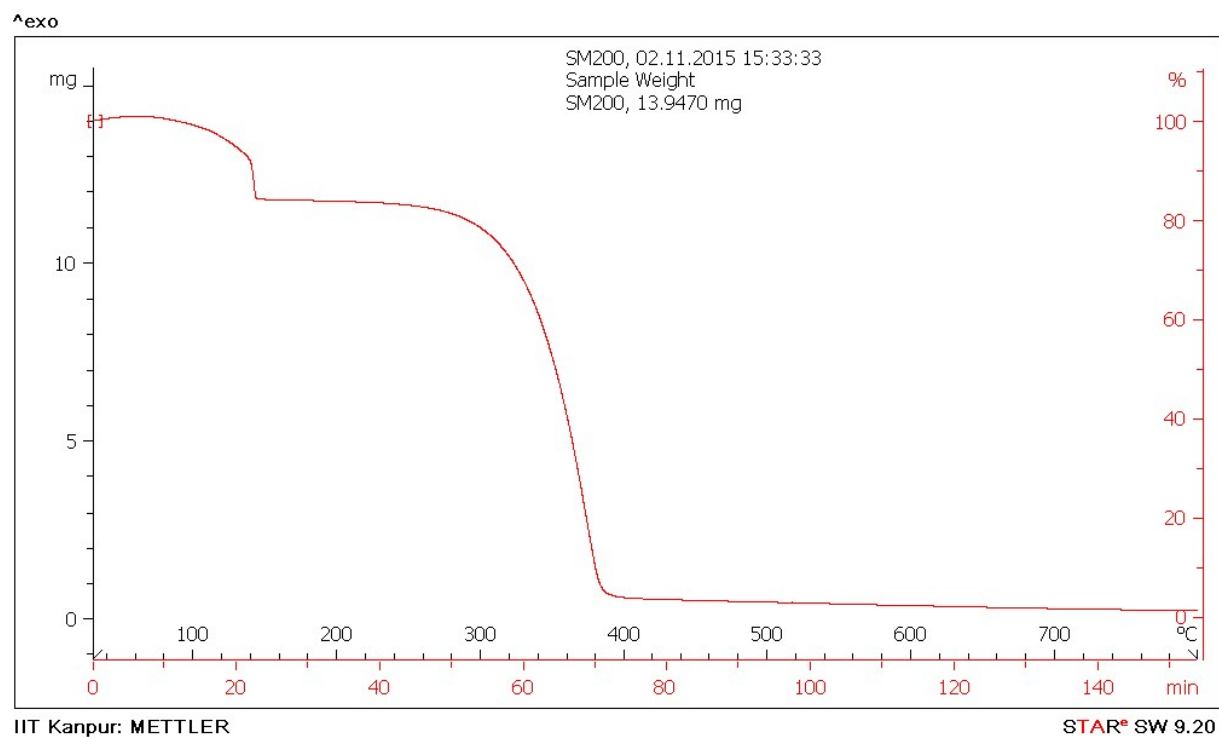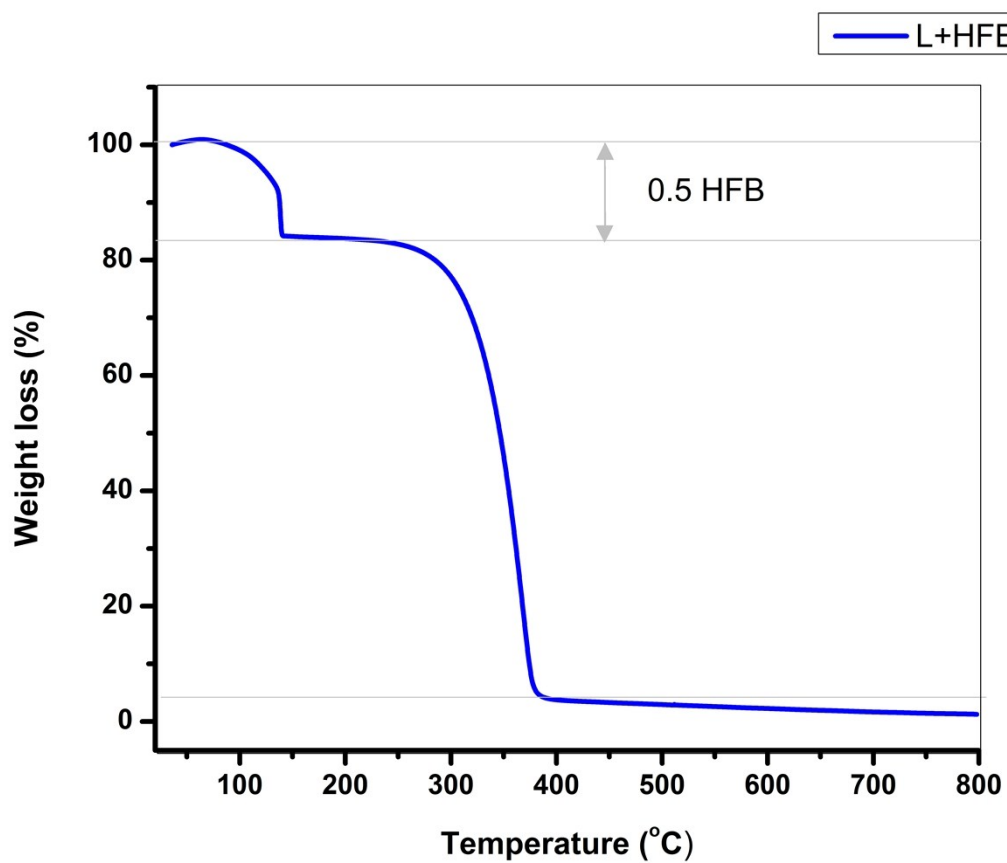

**Table S 1.** Crystallographic data for 2,4,6-tris(phenylthio)-1,3,5-triazine (1): CCDC-1403546

|                                   |                                                               |                                                                           |
|-----------------------------------|---------------------------------------------------------------|---------------------------------------------------------------------------|
| Identification code               | 23janb_sq                                                     |                                                                           |
| Empirical formula                 | C <sub>21</sub> H <sub>15</sub> N <sub>3</sub> S <sub>3</sub> |                                                                           |
| Formula weight                    | 405.54                                                        |                                                                           |
| Temperature                       | 123(2) K                                                      |                                                                           |
| Wavelength                        | 0.71073 Å                                                     |                                                                           |
| Crystal system                    | Monoclinic                                                    |                                                                           |
| Space group                       | C 2/c                                                         |                                                                           |
| Unit cell dimensions              | a = 33.368(9) Å<br>b = 13.694(3) Å<br>c = 23.569(7) Å         | <b>alpha</b> = 90°.<br><b>beta</b> = 133.022(10)°.<br><b>gamma</b> = 90°. |
| Volume                            | 7873(4) Å <sup>3</sup>                                        |                                                                           |
| Z                                 | 16                                                            |                                                                           |
| Density (calculated)              | 1.369 Mg/m <sup>3</sup>                                       |                                                                           |
| Absorption coefficient            | 0.387 mm <sup>-1</sup>                                        |                                                                           |
| F(000)                            | 3360                                                          |                                                                           |
| Crystal size                      | 0.32 x 0.23 x 0.08 mm <sup>3</sup>                            |                                                                           |
| Theta range for data collection   | 1.705 to 25.260°.                                             |                                                                           |
| Index ranges                      | -40 ≤ h ≤ 39, -16 ≤ k ≤ 16, -28 ≤ l ≤ 27                      |                                                                           |
| Reflections collected             | 20642                                                         |                                                                           |
| Independent reflections           | 7104 [R(int) = 0.0645]                                        |                                                                           |
| Completeness to theta = 25.260°   | 99.4 %                                                        |                                                                           |
| Absorption correction             | Semi-empirical from equivalents                               |                                                                           |
| Max. and min. transmission        | 1.000 and 0.369                                               |                                                                           |
| Refinement method                 | Full-matrix least-squares on F <sup>2</sup>                   |                                                                           |
| Data / restraints / parameters    | 7104 / 0 / 487                                                |                                                                           |
| Goodness-of-fit on F <sup>2</sup> | 1.006                                                         |                                                                           |
| Final R indices [I > 2σ(I)]       | R1 = 0.0523, wR2 = 0.1161                                     |                                                                           |
| R indices (all data)              | R1 = 0.0847, wR2 = 0.1345                                     |                                                                           |
| Extinction coefficient            | n/a                                                           |                                                                           |
| Largest diff. peak and hole       | 0.487 and -0.317 e.Å <sup>-3</sup>                            |                                                                           |

**Table S 2.** Crystallographic data for 2,4,6-tris(p-tolylthio)-1,3,5-triazine (2): CCDC-1403547

|                                   |                                                               |                                                  |
|-----------------------------------|---------------------------------------------------------------|--------------------------------------------------|
| Identification code               | 2janc                                                         |                                                  |
| Empirical formula                 | C <sub>24</sub> H <sub>21</sub> N <sub>3</sub> S <sub>3</sub> |                                                  |
| Formula weight                    | 447.62                                                        |                                                  |
| Temperature                       | 123(2) K                                                      |                                                  |
| Wavelength                        | 0.71073 Å                                                     |                                                  |
| Crystal system                    | Monoclinic                                                    |                                                  |
| Space group                       | P 21/n                                                        |                                                  |
| Unit cell dimensions              | a = 7.5595(16) Å<br>b = 9.694(2) Å<br>c = 29.683(6) Å         | alpha= 90°.<br>beta= 96.753(4)°.<br>gamma = 90°. |
| Volume                            | 2160.2(8) Å <sup>3</sup>                                      |                                                  |
| Z                                 | 4                                                             |                                                  |
| Density (calculated)              | 1.376 Mg/m <sup>3</sup>                                       |                                                  |
| Absorption coefficient            | 0.360 mm <sup>-1</sup>                                        |                                                  |
| F(000)                            | 936                                                           |                                                  |
| Crystal size                      | 0.32 x 0.19 x 0.12 mm <sup>3</sup>                            |                                                  |
| Theta range for data collection   | 2.21 to 28.37°.                                               |                                                  |
| Index ranges                      | -9<=h<=9, -12<=k<=12, -25<=l<=39                              |                                                  |
| Reflections collected             | 13058                                                         |                                                  |
| Independent reflections           | 4982 [R(int) = 0.0496]                                        |                                                  |
| Completeness to theta = 25.50°    | 99.4 %                                                        |                                                  |
| Absorption correction             | Semi-empirical from equivalents                               |                                                  |
| Max. and min. transmission        | 1.000 and 0.772                                               |                                                  |
| Refinement method                 | Full-matrix least-squares on F <sup>2</sup>                   |                                                  |
| Data / restraints / parameters    | 4982 / 0 / 274                                                |                                                  |
| Goodness-of-fit on F <sup>2</sup> | 1.083                                                         |                                                  |
| Final R indices [I>2sigma(I)]     | R1 = 0.0514, wR2 = 0.1233                                     |                                                  |
| R indices (all data)              | R1 = 0.0770, wR2 = 0.1545                                     |                                                  |
| Largest diff. peak and hole       | 0.503 and -0.373 e.Å <sup>-3</sup>                            |                                                  |

**Table S 3.** Crystallographic data for 2,4,6-tris((4-chlorophenyl)thio)-1,3,5-triazine (3): CCDC-1403548

|                                   |                                                                               |                                                                         |
|-----------------------------------|-------------------------------------------------------------------------------|-------------------------------------------------------------------------|
| Identification code               | 19jana                                                                        |                                                                         |
| Empirical formula                 | C <sub>21</sub> H <sub>12</sub> Cl <sub>3</sub> N <sub>3</sub> S <sub>3</sub> |                                                                         |
| Formula weight                    | 508.87                                                                        |                                                                         |
| Temperature                       | 123(2) K                                                                      |                                                                         |
| Wavelength                        | 0.71073 Å                                                                     |                                                                         |
| Crystal system                    | Monoclinic                                                                    |                                                                         |
| Space group                       | P 21/n                                                                        |                                                                         |
| Unit cell dimensions              | a = 10.233(3) Å<br>b = 14.350(4) Å<br>c = 14.563(4) Å                         | <b>alpha</b> = 90°.<br><b>beta</b> = 90.980(5)°.<br><b>gamma</b> = 90°. |
| Volume                            | 2138.1(10) Å <sup>3</sup>                                                     |                                                                         |
| Z                                 | 4                                                                             |                                                                         |
| Density (calculated)              | 1.581 Mg/m <sup>3</sup>                                                       |                                                                         |
| Absorption coefficient            | 0.737 mm <sup>-1</sup>                                                        |                                                                         |
| F(000)                            | 1032                                                                          |                                                                         |
| Crystal size                      | 0.17 x 0.15 x 0.08 mm <sup>3</sup>                                            |                                                                         |
| Theta range for data collection   | 1.993 to 28.391°.                                                             |                                                                         |
| Index ranges                      | -9<=h<=13, -18<=k<=19, -19<=l<=19                                             |                                                                         |
| Reflections collected             | 12975                                                                         |                                                                         |
| Independent reflections           | 4952 [R(int) = 0.0623]                                                        |                                                                         |
| Completeness to theta = 25.500°   | 99.5 %                                                                        |                                                                         |
| Absorption correction             | Semi-empirical from equivalents                                               |                                                                         |
| Refinement method                 | Full-matrix least-squares on F <sup>2</sup>                                   |                                                                         |
| Data / restraints / parameters    | 4952 / 0 / 271                                                                |                                                                         |
| Goodness-of-fit on F <sup>2</sup> | 1.060                                                                         |                                                                         |
| Final R indices [I>2sigma(I)]     | R1 = 0.0461, wR2 = 0.1043                                                     |                                                                         |
| R indices (all data)              | R1 = 0.0800, wR2 = 0.1298                                                     |                                                                         |
| Extinction coefficient            | n/a                                                                           |                                                                         |
| Largest diff. peak and hole       | 0.739 and -0.474 e.Å <sup>-3</sup>                                            |                                                                         |



**Table S 4.** Crystallographic data for 2,4,6-tris((3-nitrophenyl)thio)-1,3,5-triazine (4): CCDC-1403549

|                                   |                                                                              |                            |
|-----------------------------------|------------------------------------------------------------------------------|----------------------------|
| Identification code               | 1julc                                                                        |                            |
| Empirical formula                 | C <sub>21</sub> H <sub>12</sub> N <sub>6</sub> O <sub>6</sub> S <sub>3</sub> |                            |
| Formula weight                    | 540.55                                                                       |                            |
| Temperature                       | 123(2) K                                                                     |                            |
| Wavelength                        | 0.71073 Å                                                                    |                            |
| Crystal system                    | Monoclinic                                                                   |                            |
| Space group                       | P 21/c                                                                       |                            |
| Unit cell dimensions              | a = 20.799(4) Å                                                              | <b>alpha</b> = 90°.        |
|                                   | b = 7.8317(15) Å                                                             | <b>beta</b> = 109.382(5)°. |
|                                   | c = 15.126(3) Å                                                              | <b>gamma</b> = 90°.        |
| Volume                            | 2324.1(8) Å <sup>3</sup>                                                     |                            |
| Z                                 | 4                                                                            |                            |
| Density (calculated)              | 1.545 Mg/m <sup>3</sup>                                                      |                            |
| Absorption coefficient            | 0.371 mm <sup>-1</sup>                                                       |                            |
| F(000)                            | 1104                                                                         |                            |
| Crystal size                      | 0.17 x 0.15 x 0.08 mm <sup>3</sup>                                           |                            |
| Theta range for data collection   | 2.800 to 28.411°.                                                            |                            |
| Index ranges                      | -27<=h<=18, -10<=k<=10, -19<=l<=20                                           |                            |
| Reflections collected             | 15610                                                                        |                            |
| Independent reflections           | 5801 [R(int) = 0.0774]                                                       |                            |
| Completeness to theta = 25.500°   | 99.4 %                                                                       |                            |
| Absorption correction             | Semi-empirical from equivalents                                              |                            |
| Max. and min. transmission        | 0.7457 and 0.6666                                                            |                            |
| Refinement method                 | Full-matrix least-squares on F <sup>2</sup>                                  |                            |
| Data / restraints / parameters    | 5801 / 0 / 325                                                               |                            |
| Goodness-of-fit on F <sup>2</sup> | 0.964                                                                        |                            |
| Final R indices [I>2sigma(I)]     | R1 = 0.0756, wR2 = 0.1106                                                    |                            |
| R indices (all data)              | R1 = 0.2272, wR2 = 0.1432                                                    |                            |
| Extinction coefficient            | n/a                                                                          |                            |
| Largest diff. peak and hole       | 0.297 and -0.193 e.Å <sup>-3</sup>                                           |                            |

**Table S 5.** Crystallographic data for 2,4,6-tris((2-methyl-5-nitrophenyl)thio)-1,3,5-triazine (5): CCDC-1403550

|                                   |                                                                              |                    |
|-----------------------------------|------------------------------------------------------------------------------|--------------------|
| Identification code               | 13apra                                                                       |                    |
| Empirical formula                 | C <sub>24</sub> H <sub>18</sub> N <sub>6</sub> O <sub>6</sub> S <sub>3</sub> |                    |
| Formula weight                    | 582.62                                                                       |                    |
| Temperature                       | 123(2) K                                                                     |                    |
| Wavelength                        | 0.71073 Å                                                                    |                    |
| Crystal system                    | Monoclinic                                                                   |                    |
| Space group                       | P 21/n                                                                       |                    |
| Unit cell dimensions              | a = 12.642(3) Å                                                              | alpha = 90°.       |
|                                   | b = 8.916(2) Å                                                               | beta = 97.804(6)°. |
|                                   | c = 23.281(5) Å                                                              | gamma = 90°.       |
| Volume                            | 2599.9(10) Å <sup>3</sup>                                                    |                    |
| Z                                 | 4                                                                            |                    |
| Density (calculated)              | 1.488 Mg/m <sup>3</sup>                                                      |                    |
| Absorption coefficient            | 0.338 mm <sup>-1</sup>                                                       |                    |
| F(000)                            | 1200                                                                         |                    |
| Crystal size                      | 0.23 x 0.18 x 0.15 mm <sup>3</sup>                                           |                    |
| Theta range for data collection   | 2.449 to 25.250°.                                                            |                    |
| Index ranges                      | -15 ≤ h ≤ 15, -9 ≤ k ≤ 10, -26 ≤ l ≤ 27                                      |                    |
| Reflections collected             | 18042                                                                        |                    |
| Independent reflections           | 4706 [R(int) = 0.0547]                                                       |                    |
| Completeness to theta = 25.250°   | 99.9 %                                                                       |                    |
| Absorption correction             | Semi-empirical from equivalents                                              |                    |
| Max. and min. transmission        | 0.7457 and 0.6369                                                            |                    |
| Refinement method                 | Full-matrix least-squares on F <sup>2</sup>                                  |                    |
| Data / restraints / parameters    | 4706 / 77 / 391                                                              |                    |
| Goodness-of-fit on F <sup>2</sup> | 1.007                                                                        |                    |
| Final R indices [I > 2σ(I)]       | R1 = 0.0495, wR2 = 0.0995                                                    |                    |
| R indices (all data)              | R1 = 0.1009, wR2 = 0.1167                                                    |                    |
| Extinction coefficient            | n/a                                                                          |                    |
| Largest diff. peak and hole       | 0.306 and -0.251 e.Å <sup>-3</sup>                                           |                    |

**Table S 6.** Crystallographic data for 2,4,6-tris(2,6-dimethylphenylthio)-1,3,5-triazine (6):  
CCDC-1436792

|                                   |                                                               |                    |
|-----------------------------------|---------------------------------------------------------------|--------------------|
| Identification code               | 24jula                                                        |                    |
| Empirical formula                 | C <sub>27</sub> H <sub>27</sub> N <sub>3</sub> S <sub>3</sub> |                    |
| Formula weight                    | 489.69                                                        |                    |
| Temperature                       | 123(2) K                                                      |                    |
| Wavelength                        | 0.71073 Å                                                     |                    |
| Crystal system                    | Monoclinic                                                    |                    |
| Space group                       | P 21/n                                                        |                    |
| Unit cell dimensions              | a = 11.446(2) Å                                               | alpha = 90°.       |
|                                   | b = 9.9569(18) Å                                              | beta = 93.964(8)°. |
|                                   | c = 22.647(4) Å                                               | gamma = 90°.       |
| Volume                            | 2574.9(8) Å <sup>3</sup>                                      |                    |
| Z                                 | 4                                                             |                    |
| Density (calculated)              | 1.263 Mg/m <sup>3</sup>                                       |                    |
| Absorption coefficient            | 0.308 mm <sup>-1</sup>                                        |                    |
| F(000)                            | 1032                                                          |                    |
| Crystal size                      | 0.26 x 0.17 x 0.15 mm <sup>3</sup>                            |                    |
| Theta range for data collection   | 2.235 to 25.252°.                                             |                    |
| Index ranges                      | -13<=h<=9, -11<=k<=11, -27<=l<=27                             |                    |
| Reflections collected             | 20447                                                         |                    |
| Independent reflections           | 4651 [R(int) = 0.0578]                                        |                    |
| Completeness to theta = 25.252°   | 99.7 %                                                        |                    |
| Absorption correction             | Semi-empirical from equivalents                               |                    |
| Max. and min. transmission        | 0.7457 and 0.6065                                             |                    |
| Refinement method                 | Full-matrix least-squares on F <sup>2</sup>                   |                    |
| Data / restraints / parameters    | 4651 / 198 / 312                                              |                    |
| Goodness-of-fit on F <sup>2</sup> | 1.022                                                         |                    |
| Final R indices [I>2sigma(I)]     | R1 = 0.0508, wR2 = 0.1135                                     |                    |
| R indices (all data)              | R1 = 0.0946, wR2 = 0.1324                                     |                    |
| Extinction coefficient            | 0.0082(14)                                                    |                    |
| Largest diff. peak and hole       | 0.262 and -0.284 e.Å <sup>-3</sup>                            |                    |

**Table S 7.** Crystallographic data for 2,4,6-tris(2,3,4,5,6-pentamethyl phenylthio)-1,3,5-triazine (7): CCDC-1436793

|                                   |                                                               |                                                    |
|-----------------------------------|---------------------------------------------------------------|----------------------------------------------------|
| Identification code               | 1julam                                                        |                                                    |
| Empirical formula                 | C <sub>36</sub> H <sub>45</sub> N <sub>3</sub> S <sub>3</sub> |                                                    |
| Formula weight                    | 615.93                                                        |                                                    |
| Temperature                       | 296(2) K                                                      |                                                    |
| Wavelength                        | 0.71073 Å                                                     |                                                    |
| Crystal system                    | Monoclinic                                                    |                                                    |
| Space group                       | P 21/n                                                        |                                                    |
| Unit cell dimensions              | a = 13.491(5) Å<br>b = 10.406(4) Å<br>c = 23.955(9) Å         | alpha = 90°.<br>beta = 94.092(7)°.<br>gamma = 90°. |
| Volume                            | 3354(2) Å <sup>3</sup>                                        |                                                    |
| Z                                 | 4                                                             |                                                    |
| Density (calculated)              | 1.220 Mg/m <sup>3</sup>                                       |                                                    |
| Absorption coefficient            | 0.250 mm <sup>-1</sup>                                        |                                                    |
| F(000)                            | 1320                                                          |                                                    |
| Crystal size                      | 0.21 x 0.17 x 0.08 mm <sup>3</sup>                            |                                                    |
| Theta range for data collection   | 1.683 to 25.252°.                                             |                                                    |
| Index ranges                      | -9<=h<=16, -12<=k<=12, -28<=l<=28                             |                                                    |
| Reflections collected             | 17498                                                         |                                                    |
| Independent reflections           | 6079 [R(int) = 0.2114]                                        |                                                    |
| Completeness to theta = 25.252°   | 99.9 %                                                        |                                                    |
| Absorption correction             | Semi-empirical from equivalents                               |                                                    |
| Max. and min. transmission        | 1.000 and 0.273                                               |                                                    |
| Refinement method                 | Full-matrix least-squares on F <sup>2</sup>                   |                                                    |
| Data / restraints / parameters    | 6079 / 18 / 394                                               |                                                    |
| Goodness-of-fit on F <sup>2</sup> | 0.906                                                         |                                                    |
| Final R indices [I>2sigma(I)]     | R1 = 0.0807, wR2 = 0.1270                                     |                                                    |
| R indices (all data)              | R1 = 0.2417, wR2 = 0.1836                                     |                                                    |
| Extinction coefficient            | n/a                                                           |                                                    |
| Largest diff. peak and hole       | 0.274 and -0.312 e.Å <sup>-3</sup>                            |                                                    |

**Table S 8.** Crystallographic data for 2,4,6-tris(2,3,4,5,6-pentamethyl phenylthio)-1,3,5-triazine (8): CCDC-1452878

|                                   |                                                                              |                     |
|-----------------------------------|------------------------------------------------------------------------------|---------------------|
| Identification code               | 30juld                                                                       |                     |
| Empirical formula                 | C <sub>21</sub> H <sub>3</sub> F <sub>12</sub> N <sub>3</sub> S <sub>3</sub> |                     |
| Formula weight                    | 621.44                                                                       |                     |
| Temperature                       | 298(2) K                                                                     |                     |
| Wavelength                        | 0.71073 Å                                                                    |                     |
| Crystal system                    | Orthorhombic                                                                 |                     |
| Space group                       | P n a 21                                                                     |                     |
| Unit cell dimensions              | a = 9.899(3) Å                                                               | <b>alpha = 90°.</b> |
|                                   | b = 12.113(3) Å                                                              | <b>beta = 90°.</b>  |
|                                   | c = 20.030(5) Å                                                              | <b>gamma = 90°.</b> |
| Volume                            | 2401.8(11) Å <sup>3</sup>                                                    |                     |
| Z                                 | 4                                                                            |                     |
| Density (calculated)              | 1.719 Mg/m <sup>3</sup>                                                      |                     |
| Absorption coefficient            | 0.419 mm <sup>-1</sup>                                                       |                     |
| F(000)                            | 1224                                                                         |                     |
| Crystal size                      | 0.29 x 0.23 x 0.17 mm <sup>3</sup>                                           |                     |
| Theta range for data collection   | 2.845 to 28.240°.                                                            |                     |
| Index ranges                      | ?<=h<=?, ?<=k<=?, ?<=l<=?                                                    |                     |
| Reflections collected             | 4627                                                                         |                     |
| Independent reflections           | 4627 [R(int) = ?]                                                            |                     |
| Completeness to theta = 25.500°   | 99.7 %                                                                       |                     |
| Absorption correction             | Semi-empirical from equivalents                                              |                     |
| Max. and min. transmission        | 0.7457 and 0.5868                                                            |                     |
| Refinement method                 | Full-matrix least-squares on F <sup>2</sup>                                  |                     |
| Data / restraints / parameters    | 4627 / 1 / 352                                                               |                     |
| Goodness-of-fit on F <sup>2</sup> | 1.001                                                                        |                     |
| Final R indices [I>2sigma(I)]     | R1 = 0.0450, wR2 = 0.0761                                                    |                     |
| R indices (all data)              | R1 = 0.1336, wR2 = 0.1014                                                    |                     |
| Absolute structure parameter      | 0.09(5)                                                                      |                     |
| Extinction coefficient            | n/a                                                                          |                     |
| Largest diff. peak and hole       | 0.216 and -0.257 e.Å <sup>-3</sup>                                           |                     |

**Table S 9.** Crystallographic data for 2,4,6-tris(2,6-dimethylphenylthio)-1,3,5-triazine (6·0.5C<sub>6</sub>F<sub>6</sub>): CCDC-1436791

|                                   |                                                                              |                      |
|-----------------------------------|------------------------------------------------------------------------------|----------------------|
| Identification code               | 6sepam                                                                       |                      |
| Empirical formula                 | C <sub>30</sub> H <sub>27</sub> F <sub>3</sub> N <sub>3</sub> S <sub>3</sub> |                      |
| Formula weight                    | 582.72                                                                       |                      |
| Temperature                       | 100(2) K                                                                     |                      |
| Wavelength                        | 0.71073 Å                                                                    |                      |
| Crystal system                    | Triclinic                                                                    |                      |
| Space group                       | P-1                                                                          |                      |
| Unit cell dimensions              | a = 9.411(2) Å                                                               | alpha = 108.662(4)°. |
|                                   | b = 12.295(3) Å                                                              | beta = 108.819(3)°.  |
|                                   | c = 13.934(3) Å                                                              | gamma = 92.389(4)°.  |
| Volume                            | 1426.8(5) Å <sup>3</sup>                                                     |                      |
| Z                                 | 2                                                                            |                      |
| Density (calculated)              | 1.356 Mg/m <sup>3</sup>                                                      |                      |
| Absorption coefficient            | 0.304 mm <sup>-1</sup>                                                       |                      |
| F(000)                            | 606                                                                          |                      |
| Crystal size                      | 0.27 x 0.21 x 0.14 mm <sup>3</sup>                                           |                      |
| Theta range for data collection   | 1.771 to 28.254°.                                                            |                      |
| Index ranges                      | -8<=h<=12, -16<=k<=16, -18<=l<=18                                            |                      |
| Reflections collected             | 8482                                                                         |                      |
| Independent reflections           | 6145 [R(int) = 0.0232]                                                       |                      |
| Completeness to theta = 25.500°   | 97.2 %                                                                       |                      |
| Absorption correction             | Semi-empirical from equivalents                                              |                      |
| Max. and min. transmission        | 1.000 and 0.573                                                              |                      |
| Refinement method                 | Full-matrix least-squares on F <sup>2</sup>                                  |                      |
| Data / restraints / parameters    | 6145 / 0 / 358                                                               |                      |
| Goodness-of-fit on F <sup>2</sup> | 1.163                                                                        |                      |
| Final R indices [I>2sigma(I)]     | R1 = 0.0930, wR2 = 0.2450                                                    |                      |
| R indices (all data)              | R1 = 0.1076, wR2 = 0.2863                                                    |                      |
| Extinction coefficient            | n/a                                                                          |                      |
| Largest diff. peak and hole       | 1.346 and -1.416 e.Å <sup>-3</sup>                                           |                      |
